# Supplementary material for: Pharmacological augmentation of nicotinamide phosphoribosyltransferase (NAMPT) protects against paclitaxel-induced peripheral neuropathy
Source: eLife. 2017 Nov 10;6:e29626. doi: 10.7554/eLife.29626 (PMC5701795; doi:10.7554/eLife.29626)
Supplement: Figure 3—source data 1. — Body weights, leukocytes, mechanical baselines, cold baselines, IENF density calculations, IENF-behavior correlation analyses, plasma drug levels for every rat by treatment group in the dose-response study. [file elife-29626-fig3-data1.xlsx]

## Sheet: Weights
Data for Figure 3: figure supplement 2 and figure supplement 3
		Body Weights (in grams)
				Day of Paradigm
	Group	Session	Rat ID	-5	-4	-3	-2	-1	0	1	2	3	4	5	6	7	8	9	10	11	12	13	14				Group	Day -5			Day -4			Day -3			Day -2			Day -1			Day 0			Day 1			Day 2
																												Mean	SEM	N	Mean	SEM	N	Mean	SEM	N	Mean	SEM	N	Mean	SEM	N	Mean	SEM	N	Mean	SEM	N	Mean
	VEH / VEH	1	9	208	213	222	235	245	244	257	267	277	285	294	294	309	315	323	326	331	331	342	350				VEH / VEH	210.375	1.89866	8	216.25	2.58947	8	225.625	2.99367	8	233.125	3.13641	8	239	3.33809	8	244.875	2.79309	8	250.875	3.41968	8	259.25
			10	211	208	214	221	226	233	234	245	249	255	260	259	267	273	277	280	287	285	293	300
			11	219	228	238	245	250	255	266	276	277	293	298	304	311	326	328	337	345	342	351	359
			12	214	223	231	241	248	254	255	263	270	280	280	282	286	290	294	298	306	303	309	316
		1	25	204	208	214	220	225	235	242	244	255	262	255	256	261	270	298	272	280	280	291	299
			26	210	215	227	233	237	244	253	258	263	264	270	279	290	292	276	300	305	306	315	320
			27	203	213	228	232	238	248	251	260	269	276	280	285	293	297	298	307	299	307	315	325
			28	214	222	231	238	243	246	249	261	263	271	275	279	286	288	294	295	313	293	302	307
	VEH / PTX	1	29	220	231	239	248	257	268	262	257	250	243	235	225	222	216	214	220	228	235	239	245				VEH / PTX	215.4	1.79238	20	223.2	1.99684	20	233.1	1.90415	20	241.45	1.91734	20	250.55	2.07805	20	260.85	2.48816	20	261.9	2.61866	20	261.95
			30	222	234	244	256	265	278	269	271	266	255	248	237	234	229	227	228	235	257	265	271
			31	219	230	239	249	257	268	266	254	254	250	239	233	226	219	212	removed	removed	removed	removed	removed
			32	207	213	226	231	235	247	235	238	234	223	210	199	194	186	180	removed	removed	removed	removed	removed
		2	1	197	206	216	225	234	235	247	246	237	236	223	214	206	211	214	229	232	241	250	258
			2	216	223	235	245	255	267	271	273	266	254	241	234	227	226	221	232	249	258	265	273
			3	207	208	219	228	237	252	255	250	247	241	224	220	215	215	219	236	243	251	255	262
			4	219	231	240	248	257	277	278	286	283	272	256	247	246	243	245	266	275	285	292	298
		2	5	212	220	230	238	248	260	262	256	248	240	222	215	207	200	196	194	196	205	220	231
			6	227	231	243	251	256	270	275	270	273	260	246	244	243	239	239	241	240	247	252	254
			7	218	225	234	241	246	252	252	247	241	230	216	210	203	198	194	207	220	226	238	247
			8	218	228	240	247	258	271	283	281	277	265	246	237	228	229	233	249	265	274	287	300
		2	29	225	224	230	239	244	250	260	247	246	239	224	212	204	204	202	216	226	235	242	253
			30	219	226	237	246	255	264	271	277	267	255	237	230	221	220	221	237	243	256	268	280
			31	222	223	230	243	257	260	265	268	258	250	242	232	221	222	219	230	250	271	279	288
			32	217	226	238	245	261	267	268	269	261	253	240	232	221	218	218	205	210	215	228	236
		2	45	209	216	222	232	244	256	245	250	251	243	234	218	212	208	198	197	removed	removed	removed	removed
			46	224	239	246	250	260	270	262	278	279	273	256	242	235	235	234	252	273	279	292	305
			47	203	210	224	232	242	248	256	263	260	249	236	233	231	237	246	258	276	281	298	310
			48	207	220	230	235	243	257	256	258	252	244	231	222	217	221	216	222	225	230	242	250
	S321 (20) / VEH	1	21	214	218	232	242	248	254	259	265	275	287	290	295	308	303	316	315	327	324	333	342				S321 (20) / VEH	216.375	3.29468	8	220.5	3.0531	8	231	3.30043	8	239.875	3.82397	8	247.5	3.81257	8	258	4.0267	8	263.125	4.48982	8	271.75
			22	213	218	228	237	246	258	262	275	278	285	293	296	297	309	312	316	320	316	324	329
			23	221	223	231	245	255	263	266	274	285	295	297	301	311	335	322	320	328	330	337	342
			24	232	235	246	257	265	276	285	292	299	311	315	321	330	316	343	341	343	352	360	365
		2	13	200	204	212	218	228	236	239	247	254	265	264	269	275	287	293	295	297	305	310	313
			14	215	220	232	238	240	255	260	271	281	289	293	300	304	314	321	325	329	333	338	342
			15	223	225	234	242	251	265	268	278	288	298	304	313	318	327	332	339	343	339	348	355
			16	213	221	233	240	247	257	266	272	281	288	292	302	309	324	327	329	330	343	346	350
	S321 (20) / PTX	1	1	217	226	237	242	246	250	261	254	247	236	224	216	217	220	218	238	251	256	267	275				S321 (20) / PTX	209.125	2.99665	8	217.625	2.57	8	228.25	2.8955	8	235.75	2.83945	8	242.125	2.78669	8	249.25	3.35277	8	253.875	3.17038	8	247.625
			2	218	227	239	248	254	260	268	263	254	241	230	221	217	220	221	230	234	251	257	262
			3	221	224	236	244	250	249	242	240	235	219	199	181	175	removed	removed	removed	removed	removed	removed	removed
			4	200	211	223	230	235	237	243	236	228	218	210	197	200	201	206	223	229	234	246	256
		2	9	205	212	223	231	233	242	250	251	248	237	229	213	203	202	216	236	244	251	262	271
			10	199	208	216	225	235	240	253	249	240	233	220	206	201	205	224	234	248	257	267	280
			11	205	216	225	231	238	252	254	238	230	229	224	217	210	206	210	223	232	235	250	261
			12	208	217	227	235	246	264	260	250	237	235	226	230	226	232	230	244	251	260	274	286
	S321 (6.6) / PTX	1	5	212	222	232	239	245	246	245	248	247	237	227	211	203	197	196	205	209	209	223	231				S321 (6.6) / PTX	213	2.67929	8	220.5	2.22807	8	229.625	1.83164	8	237.25	2.3585	8	243.75	2.24205	8	248.75	2.47668	8	248.875	2.52443	8	252.125
			6	207	216	231	236	240	243	241	245	246	235	222	202	193	187	184	183	removed	removed	removed	removed
			7	222	227	233	242	249	253	245	245	233	228	219	209	206	212	207	230	247	243	258	267
			8	217	221	230	239	245	250	246	247	230	222	213	201	198	203	201	201	221	226	236	248
		2	41	221	230	237	248	253	261	264	272	270	260	250	246	242	240	245	254	254	266	276	285
			42	199	210	220	226	234	242	248	254	246	244	237	230	218	219	215	227	233	238	249	258
			43	215	221	229	237	247	254	254	256	256	250	237	235	231	234	233	237	248	250	253	260
			44	211	217	225	231	237	241	248	250	241	232	217	210	197	191	186	190	200	205	210	223
	S321 (2.2) / PTX	1	37	217	226	239	246	250	261	245	248	243	234	221	212	206	195	187	188	removed	removed	removed	removed				S321 (2.2) / PTX	208.625	3.5704	8	214.25	3.3793	8	223.875	3.56289	8	232.5	3.42783	8	239.75	3.36871	8	249.25	4.46714	8	243.125	5.58198	8	242.25
			38	205	212	218	226	231	238	227	225	217	210	198	191	187	181	180	167	removed	removed	removed	removed
			39	202	207	217	225	230	238	230	233	228	217	209	196	190	180	removed	removed	removed	removed	removed	removed
			40	192	201	213	222	230	240	224	221	218	207	198	189	185	183	184	189	198	213	222	226
		2	21	217	215	222	230	239	249	250	244	244	234	219	212	206	205	202	213	229	238	252	260
			22	221	230	240	247	255	274	271	268	265	260	252	246	238	233	243	259	270	277	286	297
			23	214	213	222	237	245	250	254	255	247	237	239	229	218	225	232	252	266	269	272	278
			24	201	210	220	227	238	244	244	244	245	237	224	219	216	222	225	235	245	247	257	266
	A20 (20) / VEH	1	33	222	223	243	250	255	269	269	274	278	286	286	296	295	300	309	309	312	318	322	328				A20 (20) / VEH	215.25	1.85886	8	221.375	2.24354	8	232.125	2.64195	8	242	2.5425	8	249.375	2.69217	8	259.375	3.27293	8	265.375	2.89666	8	274.75
			34	213	218	233	246	255	266	268	277	289	296	301	304	303	309	314	314	322	317	331	338
			35	219	234	243	253	260	273	270	281	282	301	301	309	312	319	333	332	340	337	348	356
			36	210	214	225	234	239	249	247	259	269	271	273	278	288	291	296	292	299	296	304	308
		2	37	213	218	225	238	246	253	263	277	290	295	300	308	318	322	330	341	337	344	353	360
			38	207	216	225	234	241	255	270	278	287	302	303	312	319	333	332	345	345	352	360	366
			39	219	224	232	243	254	261	273	282	293	298	302	311	320	330	326	336	338	340	348	354
			40	219	224	231	238	245	249	263	270	279	286	287	296	299	306	305	314	312	320	329	336
	A20 (20) / PTX	1	17	202	207	214	224	230	238	233	239	233	232	221	218	213	216	217	232	243	246	254	261				A20 (20) / PTX	213	2.69258	8	216	2.79029	8	225.25	3.85334	8	233.625	3.81696	8	241	3.90969	8	248.75	3.69242	8	245.75	3.67302	8	248
			18	226	230	245	255	262	268	260	268	248	239	232	226	225	205	200	197	207	221	222	227
			19	205	211	224	231	238	249	240	245	239	228	213	210	210	219	232	237	249	255	263	270
			20	214	220	233	238	244	254	247	241	228	228	227	234	229	223	239	243	259	262	272	278
		2	25	210	207	211	219	225	238	234	240	235	225	216	211	214	220	222	228	233	241	252	260
			26	217	222	230	238	245	255	251	255	253	244	230	226	228	233	233	239	242	251	256	261
			27	218	216	225	231	241	239	242	238	234	226	214	206	199	196	200	212	220	224	236	243
			28	212	215	220	233	243	249	259	258	248	239	219	206	194	186	179	192	201	219	232	241
	A20 (6.6) / PTX	1	41	226	235	249	257	264	280	266	265	257	246	231	220	217	220	235	253	256	267	276	286				A20 (6.6) / PTX	216.125	3.98406	8	223.375	3.72701	8	233.375	4.33399	8	242	4.17475	8	249.75	4.34145	8	259.125	5.63293	8	252.25	5.29066	8	254.375
			42	209	218	224	236	246	251	230	227	221	211	197	195	195	195	202	213	220	223	240	252
			43	234	238	252	257	265	279	267	271	261	249	239	241	249	243	248	267	270	278	289	295
			44	210	217	231	240	246	260	245	243	238	230	221	210	204	197	196	205	215	226	232	236
		2	33	222	228	236	247	257	261	270	276	277	270	255	246	242	242	242	261	251	272	290	303
			34	218	223	230	240	247	258	253	253	240	240	232	220	208	203	210	231	234	243	255	263
			35	198	205	215	221	227	230	235	240	236	240	220	207	203	216	224	232	241	244	253	259
			36	212	223	230	238	246	254	252	260	248	227	225	218	213	212	214	227	240	243	255	264
	A20 (2.2) / PTX	1	13	215	218	226	238	247	254	255	256	253	242	228	218	219	212	200	200	216	230	238	243				A20 (2.2) / PTX	218	4.11009	8	221.5	4.11877	8	229.875	4.17235	8	240.25	4.01226	8	249	3.56571	8	258.875	3.93899	8	258.625	3.39084	8	258.75
			14	230	231	241	250	256	262	262	258	245	236	223	208	202	197	197	196	197	207	208	211
			15	237	241	248	258	265	280	273	271	263	252	244	230	222	210	207	212	206	191	removed	removed
			16	216	222	232	243	252	261	260	261	257	245	234	221	211	205	205	211	218	235	245	253
		2	17	208	205	211	222	233	242	241	245	240	230	220	205	200	196	194	213	218	233	240	245
			18	200	208	218	229	238	252	252	256	259	250	241	241	238	234	239	247	256	260	270	283
			19	218	222	231	238	248	255	260	257	258	245	231	223	216	219	223	234	249	256	257	261
			20	220	225	232	244	253	265	266	266	268	252	240	234	225	226	231	244	247	258	266	276
[truncated: 38 more columns]

## Sheet: Leukocytes
Data for Figure 3: figure supplement 2 and figure supplement 3
			Leukocyte Counts (# WBCs / μl blood)
						Day -4		Day 9		Day 15
			Group	Session	Rat ID	Count	WBC/μL (x 103)	Count	WBC/μL (x 103)	Count	WBC/μL (x 103)			Group	Day -4			Day 9			Day 15
															Mean	SEM	N	Mean	SEM	N	Mean	SEM	N
			VEH / VEH	1	9	242	12.1	201	10.05	170	8.5			VEH / VEH	13.8875	1.08903	4	15.675	1.981	4	10.85	0.80026	4
					11	294	14.7	336	16.8	225	11.25
				1	25	243	12.15	330	16.5	232	11.6
					27	332	16.6	387	19.35	241	12.05
			VEH / PTX	1	29	347	17.35	76	3.8	224	11.2			VEH / PTX	11.515	0.845217	10	3.955	0.496345	10	10.065	1.20681	10
					31	276	13.8	25	1.25	404	20.2
				2	1	203	10.15	85	4.25	183	9.15
					3	258	12.9	118	5.9	162	8.1
				2	5	163	8.15	74	3.7	155	7.75
					7	227	11.35	79	3.95	165	8.25
				2	29	212	10.6	77	3.85	230	11.5
					31	207	10.35	101	5.05	164	8.2
				2	45	235	11.75	34	1.7	176	8.8
					47	175	8.75	122	6.1	150	7.5
			S321 (20) / VEH	1	21	302	15.1	396	19.8	211	10.55			S321 (20) / VEH	13.825	0.609132	4	17.775	1.60954	4	11.325	0.777951	4
					23	292	14.6	400	20	220	11
				2	13	261	13.05	262	13.1	272	13.6
					15	251	12.55	364	18.2	203	10.15
			S321 (20) / PTX	1	1	203	10.15	75	3.75	229	11.45			S321 (20) / PTX	10.75	0.361132	4	6.2375	1.0268	4	12.2	1.24616	4
					4	232	11.6	110	5.5	318	15.9
				2	9	222	11.1	145	7.25	212	10.6
					11	203	10.15	169	8.45	217	10.85
			S321 (6.6) / PTX	1	5	188	9.4	65	3.25	207	10.35			S321 (6.6) / PTX	11.8	1.1538	4	4.5375	0.906315	4	10.025	0.214573	4
					7	299	14.95	56	2.8	197	9.85
				2	41	227	11.35	110	5.5	190	9.5
					43	230	11.5	132	6.6	208	10.4
			S321 (2.2) / PTX	1	37	294	14.7	29	1.45	removed	removed			S321 (2.2) / PTX	11.8375	1.19328	4	3.9125	0.870435	4	10.7667	1.22622	3
					39	258	12.9	82	4.1	208	10.4
				2	21	201	10.05	92	4.6	261	13.05
					23	194	9.7	110	5.5	177	8.85
			A20 (20) / VEH	1	33	258	12.9	349	17.45	157	7.85			A20 (20) / VEH	11.3875	1.39469	4	14.65	1.2403	4	10.1125	1.10856	4
					35	291	14.55	315	15.75	250	12.5
				2	37	176	8.8	235	11.75	173	8.65
					39	186	9.3	273	13.65	229	11.45
			A20 (20) / PTX	1	17	344	17.2	214	10.7	231	11.55			A20 (20) / PTX	13.275	2.09747	4	9.7875	1.99608	4	10.025	0.623331	4
					19	329	16.45	300	15	202	10.1
				2	25	215	10.75	149	7.45	199	9.95
					27	174	8.7	120	6	170	8.5
			A20 (6.6) / PTX	1	41	284	14.2	122	6.1	188	9.4			A20 (6.6) / PTX	12.6125	0.607033	4	6.9375	0.414515	4	10.05	1.00809	4
					43	248	12.4	145	7.25	179	8.95
				2	33	225	11.25	129	6.45	176	8.8
					35	252	12.6	159	7.95	261	13.05
			A20 (2.2) / PTX	1	13	254	12.7	29	1.45	185	9.25			A20 (2.2) / PTX	11.9625	1.14626	4	3.7125	1.50974	4	10.9	0.80234	4
					15	171	8.55	18	0.9	247	12.35
				2	17	266	13.3	108	5.4	244	12.2
					19	266	13.3	142	7.1	196	9.8

## Sheet: Mechanical
Data for Figure 3, and for Figure 3, figure supplement 1 and figure supplement 2
			Mechanical Baselines (paw withdrawal thresholds in grams)
			Group	Session	Rat ID	Day -5				Day 0				Day 7				Day 10				Day 12				Day 14				Day -5	Day 0	Day 7	Day 10	Day 12	Day 14		Group	Day -5			Day 0			Day 7			Day 10
																														Mean	Mean	Mean	Mean	Mean	Mean			Mean	SEM	N	Mean	SEM	N	Mean	SEM	N	Mean	SEM	N
			VEH / VEH	1	9	52.3	35.5	47.2		36.8	33.9	55.8		49.1	35.7	42.7		56.8	42	37.8		48.8	52.9	40.4		51.2	49.9	51.9		41.3033	2.35667	0.646667	6.63	4.88	3.26333		VEH / VEH	42.4296	0.690189	8	1.26333	1.12462	8	0.945417	1.38988	8	2.7792	1.87367	8
						27.7	49.8	35.32		43.3	48.5			24.4	45.1	54.7		30.9	60.2	59.9		47.7	63	24.3		33.3	54.4	26.7
					10	31.2	58	38.4		46.6	38.7	43.7		31.9	49.4	41.8		53.1	37.9	46.6		47.8	49.4	47.8		42.8	42.9	52.4		44.3	2.9	-0.816667	1.31667	5.26667	0.45
						42.3	60	35.9		56.5	50.5			33.1	49.5	55.2		55.1	35.4	45.6		60.9	51.5	40		32.3	43.1	55
					11	44.5	32.7	38.8		37.6	49	48.5		64.9	56.2	35.7		53.1	74.3	34.8	43.7	63	25.1	37.9		38.9	51.9	43.3		41.0333	4.40667	8.56667	7.94167	2.23333	2.26667
						57.9	40.5	31.8		38.1	54			60	25.1	55.7		39.1	45.2	34.3	67.3	40.6	51.9	41.1		39.4	42.8	43.5
					12	64.5	25.5	46.6		54.2	51.5	37.7		33.1	50.6	43.8		52.3	26	52.1	36.6	26.7	43.6	50.6		42.6	66	54.1		45.45	-2.69	-0.133333	-2.42143	-1.98333	4.68333
						49.3	35	51.8		36	34.4			58.6	38.9	46.9		44.6	41.9	47.7		41.7	40.4	57.8		52.6	67.2	18.3
				1	25	52.2	42.6	27.5		65.4	37.1	39.6		57.3	38.1	53.2		39.8	35	58.2		37.3	23.9	53.1		66.3	43.3	42.2		40.6833	3.88333	2.3	6.13333	-2.06667	5.3
						46.5	40.2	35.1		47	50.6	27.7		37.8	28.2	43.3		45.6	47	55.3		38	38.6	40.8		53.7	26.5	43.9
					26	62.1	27.9	54.8		58.4	37	57.2		68.2	55.5	36.1		30	42.2	25.8		65.3	40.4	53.6		39	49.7	54.6		44.3667	3.35	-0.566667	-7.43333	9.58333	3.85
						55.4	25.9	40.1		48.9	41.7	43.1		29	33.7	40.3		42.3	45.5	35.8		51	57.3	56.1		54.9	45	46.1
					27	42	46.1	30.9		36.4	42	23.9		30	47.6	43.1		48.2	40.5	67.1		50.3	39.9	32.6		44.2	60.4	65.7		40.5333	-4.08333	2.8	4.7	-0.916667	8.18333
						41.4	30.5	52.3		46.5	26.4	43.5		63.6	30.5	45.2		37.5	32.5	45.6		26.5	48.3	40.1		42.6	24.4	55
					28	58.1	43.5	37.8		37.7	49.6	34.2		20.3	48	44.9		60.8	35.2	43.9		55.7	68.5	42.8		36.6	28.9	46.3		41.7667	-0.0166667	-5.23333	5.36667	7.7	4.3
						37.9	29.5	43.8		53.8	41.2	34		40.1	28.8	37.1		51.2	60.3	31.4		39.8	51.4	38.6		58.4	48.1	58.1
			VEH / PTX	1	29	47.8	58.4	42.3		48.2	58.1	52.2		52.6	34.8	43.2		26.4	33	34.5	48	19.4	29.5	22.5	46.9	30.6	24.9	11.8	41.1	45.0167	-2.18333	-5.96667	-9.08333	-16.0024	-14.4167		VEH / PTX	43.4918	0.548213	20	-0.74775	0.674785	20	-17.639	1.52511	20	-16.5006	1.24128	18
						34.7	34.7	52.2		44.6	20	33.9		32.1	44.5	27.1		35.9	37.8			32.9	31.9	20		41.9	34.9	29
					30	50.3	38.5	37.3		36.2	37.1	44.7		21.9	22.3	53.1		24	12.5	25.4	50.7	35.5	6.8	24.5		14.1	35.5	21		42.1833	-2.05	-11.2833	-11.8333	-14.65	-14.8333
						54.6	29	43.4		46.8	49.6	26.4		23.8	28.6	35.7		24.6	27.1	22.6	55.9	29	18	51.4		25.8	43.6	24.1
					31	55.7	40.4	39.8		58	46.8	39.2		31.1	37.4	14.9	9.6	removed				removed				removed				42.8667	1.09333	-25.1417	-	-	-
						42.4	35.1	43.8		40.6	35.2			10.2	20.4	12	6.2
					32	39.9	33.5	42		56.1	35.7	46.9		9.7	13.9	15.9	6.9	removed				removed				removed				38.2	5.12	-17.7	-	-	-
						30.3	45.7	37.8		45.8	32.1			32.2	31	48.2	6.2
				2	1	46.2	34.5	59.3		38.5	43.3	56		18.9	13.7	10.3	39.8	38.8	34.1	11.1	31.8	24.1	51.8	29.5	17.4	26.6	15.1	15.5	33.2	44.45	-1.98333	-17.2875	-13.6375	-11.7	-15.5875
						47.8	46.6	32.3		37.9	36.4	42.7		17.6	50.6	20.2	46.2	19.6	30.8	50.5	29.8	55.1	29.4	30	24.7	54.2	22.4	29.7	34.2
					2	47.4	35.7	58.4		54.3	43.3	45.6		5.7	19.2	45.2	10.8	24.1	10.6	14.8	16.9	17.7	29.8	16.2	36.8	10.1	7.7	29.7	15.8	44.65	-2.31667	-27.4125	-25.0125	-13.95	-25.5
						38.5	48.7	39.2		29.5	36.9	44.4		13.9	23.5	10.5	9.1	35.1	15.6	23.6	16.4	45.5	20	65.9	13.7	6.4	39.8	21.9	21.8
					3	35.6	56.8	47		23	48.8	68.5		5.6	21.7	54.2	22.8	9.2	20.4	56.2	33.8	28.8	15.4	14	21.1	7.9	10	17.3	9.4	46.5333	-4.06667	-26.0083	-20.9833	-20.9333	-27.4333
						57.4	38.3	44.1		34.2	23.8	56.5		24.6	10	12.5	12.8	14.2	29.4	19.2	22	52.3	28.6	26.4	18.2	21.3	17.1	24.6	45.2
					4	30.3	47.1	37.2		54.2	33.2	62.4		24.9	8.1	43.9	27.3	40.7	19.2	40	16.7	24.4	31.9	47.2	40.6	19.7	48.5	20.9	14.8	43.6517	3.515	-20.0017	-12.6017	-5.92667	-12.8142
						58.7	40.31	48.3		42.9	45.9	44.4		27.9	5.1	34.5	17.5	23.4	49	27.8	31.6	26.4	19.9	62.3	49.1	34.4	9.9	53	45.5
				2	5	41.7	55.1	35.6		32.2	53.7	51.9		12.1	27.9	20.3	53.7	43.6	22	40.9	34.1	46.2	21.9	25.6	35.2	39.6	33.8	22.8	21.7	44.2167	-2.98333	-12.5042	-10.3292	-9.42917	-19.9042
						41.9	52	39		39.7	39.1	30.8		43.7	46.7	11.7	37.6	27.1	31.5	20	51.9	35.2	49.9	30.9	33.4	9.7	37.7	7.9	21.3
					6	29.5	52.7	56.9		36.5	34.7	52.4		40.3	18.6	37.4	19.6	32	33.8	10.9	20.3	39.3	34.2	51.5	23.4	27.7	13.7	37.6	26.8	43.8167	-0.733333	-9.40417	-15.6542	-4.11667	-20.5167
						38.1	45	40.7		40.8	48.1	46		41.8	49.2	39.9	28.5	30.3	27	34.4	36.6	56.1	25.1	37.8	50.2	18	34.6	15	13
					7	54.4	60.7	39.6		50	33.1	23.9		17.7	8.9	10.7	5.1	45.8	16.3	17.8	12.9	10	13.7	15.6	26.9	19.3	25.8	20.7	8.3	46.85	-6.75	-28.4875	-24.3	-25.5875	-26.8625
						40.5	46.3	39.6		55	42	36.6		41.6	37.7	9.5	15.7	20.6	12.6	21.4	33	13.3	24.1	39.8	26.7	10.8	24.4	11.6	39
					8	45	40.4	36.9		29.8	35.5	41.1		36.1	35.4	33.8	12.4	40.6	18	16.4	26.7	32.6	41.7	28.6	33.4	27.2	24.8	26.1	44.3	42.4333	-0.283333	-13.0708	-14.1083	-7.94583	-6.99583
						54.7	46	31.6		44.2	33.5	68.8		52.3	10	29.8	25.1	22.2	41.8	34.6	26.3	32	13.4	39.2	55	37.9	45	33	45.2
				2	29	30	41.3	49.5		54.8	47	47.4		17.6	6.6	33.3	20.8	10	24.7	8.3	29.9	12.9	8.2	20.8	40.3	16.6	46.6	31.9	20.9	38.95	4.36667	-22.9375	-19.3	-19.7125	-14.3375
						28.6	37.9	46.4		31	37.7	42		13.7	12.7	15	8.4	9.9	18.9	38	17.5	28.4	12.7	9	21.6	15.1	21.7	12.7	31.4
					30	24.9	40.5	40.9		29.5	27	40		45.6	19	7.4	28.4	43.5	32.9	36.3	17.9	44.1	29	19.1	31.4	32.8	5.3	41.2	30.3	40.45	-1.63333	-11.5071	-12.825	-14.4	-12.475
						36.2	52.1	48.1		53	37.2	46.2		20.3	42.2	39.7		25.9	22.3	12.6	29.6	23.7	19.6	20	21.5	13.6	23.3	27.5	49.8
					31	48.5	47.4	33.1		38.8	54.8	42.2		27.8	17	41.8	48.2	45.2	17.7	11.7	37.1	19.6	31.9	57.6	16.3	25.6	26.8	44.5	26.7	41.4167	0.566667	-6.55417	-15.5417	-6.11667	-8.86667
						35.2	34.8	49.5		31.2	34.7	50.2		30.6	26.8	40.1	46.6	25	28.8	22.6	18.9	45	49.5	45.2	17.3	24	42.6	40.7	29.5
					32	51.2	50.5	46.6		29.2	48	27.3		24.2	10.8	16.2	9.5	37.1	9.3	28.4	40.2	51.1	34.3	22.8	36	14.1	19.5	29.3	9.1	45.15	-2.28333	-23.75	-17.9125	-14.1375	-22.575
						35.9	39	47.7		43.4	43	66.3		30.6	43.8	15.3	20.8	17.2	13.6	51.7	20.4	23.2	21	42.2	17.5	12.3	29.1	48.6	18.6
				2	45	59.7	49.3	30.2		67.2	33.1	47.1		12.7	32.1	19.3	43.5	36.8	20.1	21.9	14.1	removed				removed				44.9833	1.63333	-16.2083	-20.8333	-	-
						61	40.1	29.6		31.4	59.2	41.7		41.3	12.7	40.2	28.4	22.8	32	17.5	28
					46	29.8	43.2	38.9		57.7	31.3	32.2		25.3	14.3	29.1	15.4	26.9	10	23	54.6	32.8	19.6	48	47.9	26.5	54.6	26.7	26.3	41.7333	2.23333	-16.4083	-10.4458	-2.47083	-11.4833
						60	27.6	50.9		56.7	38.6	47.3		35.8	15.3	24.6	42.8	26.2	35.9	57.3	16.4	20.7	48.8	60.7	35.6	23.6	19.2	32	33.1
					47	55.1	70.2	37.7		49.4	52.7	55.8		19.1	50	21	17.9	17.5	8.3	21.5	15.3	25.2	18.4	37.8	15.8	8	20	27.3	19.4	46.8167	-3.5	-20.9292	-26.1792	-18.0542	-23.7792
						40.7	48.6	28.6		28.1	31.3	42.6		17.4	17.8	44.2	19.7	46.6	12.9	20	23	46.9	15	39	32	15	23.4	29	42.2
					48	43.8	51.7	46.2		45	49.3	27.5		33.9	38	17.9	21.7	45.5	30	26.8	28.8	11.2	18.6	14.5	34.2	26.1	10.7	27.7	20	45.4667	-2.71667	-20.2167	-16.4292	-18.5167	-20.3667
						31.2	51.8	48.1		35.5	43	56.2		29.4	29.7	14.3	17.1	15.2	21.5	28.3	36.2	11.4	54.2	27.2	44.3	30.1	40.3	13.5	32.4
			S321 (20) / VEH	1	21	54.1	30.2	60.5		55.4	45.6	55		43.1	53.2	48.4		49.8	43.8	52.6		39.3	61.3	40.2		40.2	31.3	41.7		43.1	2.18	4.7	4.9	-1.61667	-0.8		S321 (20) / VEH	43.9021	1.13135	8	1.05167	1.31095	8	0.6375	0.871647	8	1.7375	1.17132	8
						51.7	26.7	35.4		37.1	33.3			36.7	55.8	49.6		50.5	59.5	31.8		27.1	28.3	52.7		42.4	41.2	57
					22	37.2	49.9	55.5		65.8	46.7	29.4		46.1	56	41.8		48.9	51.7	42.8		45.8	65.4	61.2		48.3	44.5	30.8		43.6333	1.24667	0.816667	0.4	4.11667	0.966667
						47.6	30.3	41.3		46.4	36.1			42.7	32.7	47.4		26.6	39.7	54.5		27.3	65.2	21.6		51.1	31.2	61.7
					23	46.9	37.9	42		47.7	48.8	49.9		33.4	21.7	46.6		43.2	39.1	46.9		48.7	45.8	27.7		35.2	58.1	43.5		39.5	6.66	2.35	3.11667	0.4	6.06667
						22.6	46.1	41.5		38.4	46			53.9	60.4	35.1		39.9	48.3	38.3		46	30.7	40.5		30.3	44	62.3
					24	43.3	32	45.4		49.8	30.3	51.3		54	40.1	33.1		41.1	45.7	35.1		60.9	48.8	49.1		60.1	50.9	46.7		40.4833	2.97667	0.833333	7.26667	8.83333	6.56667
						34.3	44.8	43.1		49.5	36.4			37	44.7	39		57.5	58.3	48.8		51.9	45.6	39.6		32.5	33.6	58.5
				2	13	61.3	40.4	45.7		53.2	23.1	39.5		21.5	46.2	50.6		55.1	33.7	48.1		39.4	40.8	44	31.7	50.2	45	53.2	50.8	43	-2.21667	-1.03333	2.7	-0.1125	1.4875
						40	44.8	25.8		49.1	47.7	32.1		40	53.3	40.2		46.7	55.2	35.4		68.1	39.4	42.6	37.1	25.4	42.5	48.1	40.7
					14	35.3	57.6	56.7		45	49.3	41.9		30.5	33.2	62.7		40.4	60.7	33.4		35.5	50.6	43.7	50.4	35.2	33.3	53.5	48.4	47.0667	-2.98333	2.13333	-1.05	-2.59167	-3.61667
						36.1	35.7	61		27.5	39.4	61.4		69.9	50.5	48.4		30.2	60.6	50.8		31.8	62.5	44.6	36.7	49	38.6	40.9	48.7
					15	45.9	47.7	34.8		43	50.9	23.8		52.8	56.6	46		45.2	46.6	50.1		33.8	45.9	50.2	34.4	56.2	44.8	39.5	49.3	49.1	-3.7	-2.63333	-1.65	-5.875	-1.6125
						64.4	53.2	48.6		66.7	30.6	57.4		46.7	39.6	37.1		69.1	30.6	43.1		57.6	44.2	45.6	34.1	64.9	36	56.5	32.7
					16	47.9	35.6	54.7		58.9	62.2	48.6		45	33.2	40.5		42.4	51.5	56.6		56.2	34.9	48	38.7	52.4	44.3	45	37.2	45.3333	4.25	-2.06667	-1.78333	-1.64583	-1.79583
						50	35.4	48.4		43.3	41.8	42.7		40	45.7	55.2		44.7	36.3	29.8		55.4	32.7	37	46.6	54	30.3	47.7	37.4
			S321 (20) / PTX	1	1	53.2	47.4	34.9		28.9	65.3	38.7		58.6	40.1	30	18.8	26.9	48.4	42.5	22.8	25.6	36.2	57.2	63.5	55.1	26.2	46.4	26	44.45	1.13	-6.43571	-3.75	-1.0875	-3.03571		S321 (20) / PTX	43.8813	0.680281	8	1.37167	0.94059	8	-9.87232	2.05385	8	-5.93036	1.48802	7
						31.5	53.8	45.9		42.2	52.8			30	36.7	51.9		54.4	49.7	40.2		38.5	48.6	51.1	26.2	43.7	55.9	36.6
					2	55.1	52.5	44.7		25.3	61.1	42.7		25.6	50.2	22	13.5	29.7	31.1	60.9	32.5	30.6	40.4	30.9	31.2	28.4	48.9	37.6	31.7	47.15	0.75	-18.2929	-6.15	-4.95	-6.15
						48.3	43.6	38.7		59.5	50.9			45.7	21.3	23.7		44	55.4	33.4		57.4	44.6	60.3		61.7	35.3	43.4
					3	48.9	48	41.8		43.6	30.7	51.1		40.1	26.2	44.8		removed				removed				removed				41.85	2.13	-4.66667	-	-	-
						34.6	24.4	53.4		53.2	41.3			38.2	28.1	45.7
					4	49.2	38.8	58		42.1	56.3	35.1		32.6	66.3	19.3		22.3	32.8	23.7	14.3	41.1	46.5	39.7	21.9	35.7	31.7	40.8		45.6833	-3.80333	-11.4667	-13.8833	-4.34583	-9.9
						49.6	32.4	46.1		31	44.9			13.6	39.6	33.9		37.7	45.5	46.3		46.5	44.5	45.7	44.8	26.1	24.6	55.8
				2	9	38.2	47.9	34.2		43.3	69.2	35.2		48.6	47.2	38.3	33.7	41.9	39.5	60.6	28.4	34	46.9	48.8	37.6	62.7	38.3	51.8	26.7	42.3167	1.83333	-3.67917	-1.00417	-2.54167	0.245833
						45.4	41.2	47		49.7	40.3	27.2		32.8	32.5	52.9	23.1	31	33.1	54.5	41.5	32.6	26.3	32.4	59.6	32.4	50.2	37.6	40.8
					10	48.2	58.8	34.4		49.2	53.3	46.6		27.4	55.7	38	25.9	58.6	38.2	29.2	46.2	65.9	17.2	45.5	42.8	39.3	50.4	29.6	59.6	44.5333	2.38333	-11.4083	-5.59583	-1.70833	-3.55833
						29.8	57.2	38.8		50.7	30.8	50.9		28.9	20	27.8	41.3	37.1	44.4	21.6	36.2	37.9	19.7	65.6	48	19.2	36.6	67.4	25.7
					11	38.8	40.6	30.7		29.2	61.4	51.4		24.3	33.6	25.6	65	43.9	24.6	31.5	26.2	30.8	30.9	31.9	18.2	29.8	40.8	56.3	44.7	41.8167	5.85	-5.27917	-5.17917	-10.9667	-1.42917
						39	39.1	62.7		58.1	33.1	52.8		53.9	25.7	20.9	43.3	54.4	28.6	39.3	44.6	23.2	30.6	46.6	34.6	25.1	37.7	45.8	42.9
					12	46.3	33.8	56.5		52.5	36.1	50.9		17.3	19.7	42.8	15.8	57.9	19.6	33.8	34.2	36.1	23	49.4	32.1	21.2	34.2	29.3	36.2	43.25	0.7	-17.75	-5.95	-7.125	-9.75
						36.2	49	37.7		36.6	36.3	51.3		34.4	20.3	22.4	31.3	50.6	28.2	45.7	28.4	42.3	44.4	41.1	20.6	60	26.3	28.9	31.9
			S321 (6.6) / PTX	1	5	42.3	27.2	35.4		51.2	38.8	30.7		24.5	18.6	19.6		8.4	26	24.8	8.6	44.3	42.3	23.9	9.8	21.5	28.4	13.9	24.6	39.1	1.46	-9.5	-21.5857	-10.925	-13.4857		S321 (6.6) / PTX	43.4354	1.10251	8	-0.412083	1.16795	8	-15.9314	2.8818	8	-14.9219	1.70573	8
						48.3	39.7	41.7		37.3	44.8			54.2	37.9	22.8		27.1	16.4	11.3		27.3	25.3	36.3	16.2	32.5	26.6	31.8
					6	32	44.1	39.5		54.4	44.5	34.8		10.3	13	18.9		42.8	30.1	12.5	52.6	removed				removed				44.9	-5.44	-26.3167	-10.5143	-	-
						65.2	36.8	51.8		40.2	23.4			17.5	18.3	33.5		28.8	27.3	46.6
					7	55	25.5	38.2		34.4	41.8	33.7		33.4	31.3	62.2	8.8	31	47.6	19.9		64.7	44.9	33.7	26.6	42.8	50.4	20.4	23.3	41.8667	-3.22667	-14.2095	-10.7333	-5.70417	-6.9381
						43.2	36.2	53.1		40.2	43.1			16	19.9	22		35.3	41.8	11.2		35.8	29	39.4	15.2	39.7	36.8	31.1
					8	40.8	42.3	41.3		44.4	39	41.8		44.9	20.7	39		43.1	36.6	9.3	39.4	22.2	48.3	29.7	43.6	17.6	47.7	21.9	15.4	42.6667	-0.106667	-4.7	-9.12917	-9.14167	-9.69167
						46.9	43.6	41.1		36	51.6			41.1	43.9	38.2		42.8	32.4	51.4	13.3	27	25.3	56.7	15.4	40.8	49.4	50.8	20.2
				2	41	50.6	54.8	53.5		35	59.5	50.3		37.2	35.4	16	18.2	37.8	20.3	25.8	21.6	36.9	21.6	35.6	37.8	30	32.7	46.5	20.3	49.5667	-3.53333	-22.6292	-14.2667	-15.4667	-18.6292
						44.3	36.9	57.3		48.6	32.6	50.2		13.6	47.3	26.9	20.9	65.2	23.2	40	48.5	34.8	21	34.5	50.6	24.7	10.9	61.8	20.6
					42	52	50.8	43.6		54.9	46.7	23.6		13.4	20.9	13.7	12.4	25.1	20.9	23.8	10.5	37.6	57	43.6	17.1	35.8	28.7	50	37.8	41.3167	0.866667	-25.7542	-16.3917	-7.02917	-4.94167
						30.7	31.6	39.2		40.5	46.3	41.1		17.1	12.3	20.3	14.4	56.4	29.7	20.3	12.7	38.2	40.2	17.1	23.5	28.6	49.9	35.8	24.4
					43	54.3	32.2	47.8		63.4	28.4	56.3		21.9	20.4	49.6	58.6	17.7	31.3	35.8	43	42.6	28.9	10.3	39.7	28.1	46.8	16	42.7	43.2333	3.46667	-9.24583	-15.0958	-11.6958	-12.1583
						41.6	46.7	36.8		48.4	44.7	39		18.8	59.6	17.6	25.4	18.9	13.1	19.9	45.4	40.5	20.1	26.4	43.8	26.4	34.8	33.5	20.3
					44	57.2	42	36.6		58.6	54.4	55.4		11.4	22.9	23.5	28.3	29.7	37.3	18.1	30.3	20.7	21.6	20.1	22.1	28.3	27.6	44	18.8	44.8333	3.21667	-15.0958	-21.6583	-26.8333	-18.0833
						60.3	37.9	35		40.2	38	41.7		58.6	16.3	55.8	21.1	26	9.4	14.4	20.2	7	25.2	5	22.3	13.5	17.8	41.5	22.5
			S321 (2.2) / PTX	1	37	42.3	34.2	39.8		28.5	42	32		18	11	23.1		39	6.8	14.2	9	removed				removed				40.1	-1.08	-20.2	-19.5125	-	-		S321 (2.2) / PTX	43	0.91791	8	0.18	1.04481	8	-17.8133	2.95011	8	-12.4435	2.74357	7
						48.9	35.2	40.2		42.9	49.7			16.9	34.9	15.5		28.9	22.8	26	18
					38	43.3	37.6	37.2		38.9	33.7	46.2		35.9	11.7	45.2		13.5	37	25	20.4	removed				removed				41.3833	0.116667	-12.1667	-13.9833	-	-
						52.3	43.7	34.2		46.4	42.3			11.2	55.3	16		28.5	31.6	32.1	31.1
					39	57.7	34.4	45.6		30.2	31.3	49		5.6	17.7	36.1	22.9	removed				removed				removed				42.75	-0.57	-22.9071	-	-	-
						38.3	33.5	47		56.2	44.2			12.4	38.3	5.9
					40	37.7	33.7	64.8		29.5	37.6	42		15.5	15.9	7.5	6.5	8.6	27.4	15.8		8.7	19.2	14.1	9	38.2	8.6	13.8		41.3333	4.80667	-30.6619	-22.95	-23.0458	-23.1
						37.5	48.4	25.9		60.3	61.3			10.7	12.7	5.9		9.4	19.7	29.4		17.4	41.2	21	15.7	16.9	21.7	10.2
				2	21	63.5	56.1	36.7		53.9	46.5	53.2		37.6	25.9	46.5	13.5	24.7	10.5	39.1	42.2	29.8	62	13.8	40.6	51.3	59.9	66.3	39.8	48.1833	-3.46667	-17.2083	-13.7708	-10.2333	-1.89583
						39.9	54.9	38		35	33.3	46.4		33	24.4	46.1	20.8	37.5	49.7	52	19.6	26.6	52.9	30.8	47.1	48.8	37.2	32.8	34.2
					22	44.4	37.7	33.2		59.6	40.2	24.9		36.9	17.7	3.6	12.6	21.8	18.6	74.9	31.1	46.3	17.7	34.7	27.7	29.9	29.7	55.7	52.1	42.55	-0.983333	-23.35	-2.7625	-7.9125	0.75
						40.7	46	53.3		39.5	36.2	49		11.1	16.5	15.1	40.1	51.2	29.2	33	58.5	27.9	68.5	24	30.3	56.3	36.2	35.8	50.7
					23	34.2	70.9	35.6		59.2	45.3	52.6		33.6	43.3	48.6	57.9	31.6	30.4	51.1	32.6	46.9	48.4	28.4	35.5	33.4	37.1	27.2	28	45.4	4.5	-3.8	-6.9625	-3.8	-3.725
						50.2	45.2	36.3		48	43.2	51.1		48.8	34.4	26.9	39.3	54.1	31.5	23.7	52.5	53.9	35	69.9	14.8	57.3	64.7	34.7	51
					24	29.9	37.2	38.3		33.3	47.7	27		24.4	51.9	17.5	25.2	27	34.2	31.9	26.3	31.6	44.2	44.3	39.3	35.9	34.4	37.1	32.2	42.3	-1.88333	-12.2125	-7.1625	-2.9875	-2.3625
						49.4	38.4	60.6		43.3	30	61.2		31.2	28.5	40.1	21.9	35	30.6	49.3	46.8	22.2	61.7	40.9	30.3	65.1	21	50.6	43.2
			A20 (20) / VEH	1	33	40	42.2	36		38.7	36.9	60.9		50.7	51.3	48.6		31.9	48.2	39.7		42.5	42.9	22.8		31.3	37.7	59.2		39.5333	3.32667	10.4167	2.66667	4.83333	3.61667		A20 (20) / VEH	44.8917	1.04805	8	-0.11375	0.926496	8	0.591667	1.58977	8	1.81458	0.807507	8
						36.1	52	30.9		43.8	34			58.2	49.4	41.5		39.9	50.9	42.6		68.4	34.7	54.9		44.6	44.1	42
					34	45.7	58.2	38.6		50.5	46.6	44.7		50.6	34.4	58.1		47.5	45.3	45.2		57.8	33.3	43.2		44.8	52.6	39		44.75	0.05	-3.25	0.4	-3.08333	-4.01667
						43.3	42.8	39.9		55.5	26.7			40.3	26.7	38.9		42.3	40.7	49.9		35.9	31.4	48.4		35.2	37.7	35.1
					35	52.7	25.1	58.6		40.6	35.1	38.1		48.2	52.9	28.7		36.7	34.7	56		41.2	59.6	57.8		52.5	55.7	53.3		41.9167	-1.47667	-2.56667	4.51667	6.13333	6.96667
						41.4	37.1	36.6		40.4	48			32.9	25.2	48.2		50.3	55.5	45.4		42.9	60.8	26		67	30.1	34.7
					36	47.2	48.6	47.7		33.7	36.8	36.3		58.9	56.9	47.9		35.9	50	54.7		46	51.5	38.6		35.7	53	40.9		46.4167	-4.97667	-0.283333	-2.08333	-2.95	-2.3
						50.4	45.1	39.5		41	59.4			31.3	40	41.8		39.5	38	47.9		30.9	46.5	47.3		31.2	61.1	42.8
				2	37	31.8	61	34.4		43.7	68.1	49.5		55.8	38.9	45.8		52.2	21.6	41.1		49.7	50	49.5	60.2	36.8	44.7	68.3	40.7	45.2833	3.08333	-1.36667	0.3	5.29167	-1.30833
						50.6	39.6	54.3		47.1	51.3	30.5		49.7	40.1	33.2		55.3	47	56.3		55.4	42.2	51.2	46.4	38.4	45.7	31.9	45.3
					38	40.5	48.6	30.2		66.6	53.2	38.3		41	45.3	56.6		37.4	44.8	54.3		67.5	32	45.5	39.1	55.8	45.5	40.7	48.3	45.25	0.05	2.51667	1.18333	-1.8625	-0.9875
						48.7	58.2	45.3		34	43.5	36.2		43.1	49.9	50.7		42.1	52.2	47.8		42.5	33.1	60.3	27.1	50.9	31.5	46.3	35.1
					39	41.7	54.9	36.4		43.6	36.7	51.3		66.7	44.7	51.3		55.9	46.2	54.9		59.6	25.4	56.4	37.3	42	66.5	51	45.2	46.9667	-0.183333	1.88333	4.46667	-0.816667	-1.04167
						54.2	44.1	50.5		56.8	58.9	33.4		51.7	45.9	32.8		43.6	60.7	47.3		48	48.9	52.8	40.8	48.8	37.8	28.9	47.2
					40	52.5	65.3	35.6		56.3	67	47		55.5	49.2	58.8		48.1	60.6	59.8		51.1	57.6	29.7	57.1	37.8	44	35	48.9	49.0167	-0.783333	-2.61667	3.06667	-4.41667	-4.55417
						47.4	54.9	38.4		46.9	29.6	42.6		45.4	36.3	33.2		50.7	41.1	52.2		37.3	38.5	40.9		41.5	56.4	42.6	49.5
			A20 (20) / PTX	1	17	23.9	59.2	33.3		33.7	64.8	63		29.6	43.4	38.3	43	60.3	27.6	53.5	24.1	60.1	30.3	35.5	43.9	45.9	66.8	22.8		37.6333	10.8267	1.80952	4.22381	4.7381	10.25		A20 (20) / PTX	41.05	0.980064	8	2.27292	1.59722	8	-3.51347	2.14508	8	-0.21689	2.11684	8
						32.9	28.8	47.7		32.2	48.6			38.7	40.1	43		46.8	49.8	30.9		28.4	68.2	30.2		56	60	35.8
					18	25.2	59.3	48.4		50.8	32.7	31.1		29	31.5	44.5	36.7	15	24.4	45.2	27.8	18	14.5	15.2	18.6	26.8	12.8	26.1		44.75	-4.33	-6.0875	-12.8357	-18.6214	-22.95
						50.4	52.5	32.7		45.6	41.9			45	34.6	44	44	37.8	21.6	51.6		55.5	24	37.1		11.2	22.8	31.1
					19	29	57.5	32.5		37.2	42.8	52.4		17.1	25.2	15.7		35.1	52	48.9		51.8	29.6	31.1	26	50.5	41.7	46.7		40.6667	2.51333	-13.0833	2.9	2.5619	8.25
						35.8	50.5	38.7		51.1	32.4			27.6	41.5	38.4		41.5	34.3	49.6		56.1	57.1	50.9		52.5	52.8	49.3
					20	29.8	30.2	37.8		45.7	33.1	42.6		46.4	57.7	54.3	27.2	52.6	37.6	45.6	30.1	19.3	52.3	66.8	63.9	23.5	41.5	45.2	22.1	40.4667	1.77333	3.3619	3.24762	6.9619	-6.21667
						44	62.8	38.2		50.9	38.9			41.4	29.5	50.3		45.6	53.9	40.6		59.7	29	41		44.2	29.6	42.1	25.8
				2	25	37.5	45.7	34.2		58.3	57.6	45.7		39.6	53.6	23.4	61.2	37.8	35.7	43.1	64.5	34.7	37.2	68.6	41.8	49.3	39.2	28.8	62.4	43.7667	3.75	-0.891667	4.69583	0.370833	3.03333
						54.2	52.6	38.4		43.3	39.3	40.9		43	50.2	27.3	44.7	50.7	54.9	48.7	52.3	20	45.6	58.6	46.6	35.1	48	48.9	62.7
					26	39.4	51.7	39.9		23.5	64.9	38.4		18.6	39.1	41.6	28.3	33.8	63.7	35.7	38.5	68.6	29.3	64.3	27.3	22.3	23.5	53.5	55.7	43.5667	-2.3	-10.0292	-1.61667	-0.954167	-2.90417
						46.4	36.1	47.9		35.3	34.6	50.9		38.9	33.1	30.4	38.3	38.8	34.8	49	41.3	58.9	27.3	29.7	35.5	32	40.9	52.8	44.6
					27	28	37.4	42.4		25.7	35.8	47.7		29.5	52.2	44	41.7	34.2	36.8	42.5	48.7	35.8	44.3	25.3	39.9	39.6	47.6	46.1	33.5	37.3833	3.9	2.09167	2.16667	3.87917	3.74167
						45.1	25.3	46.1		45.5	42.2	50.8		32.3	50.2	29.9	36	22.1	40.5	56.8	34.8	28.3	66	36.6	53.9	26.2	40.9	54	41.1
					28	46.6	35.6	45.2		45.8	34	42.2		67.7	23.7	19.9	20.9	20.8	45.5	30.8		53.8	57.3	44.7		53	31.3	33	58.1	40.1667	2.05	-5.27917	-4.51667	1.47333	0.170833
						33.5	44	36.1		30.8	48.6	51.9		29	46.4	33.9	37.6	51.9	20.9	44		18	34.4			31.3	61.7	20.5	33.8
			A20 (6.6) / PTX	1	41	23.6	52.1	54.3		50.3	39.2	32.7		10.6	20.8	11.5		37.7	24.6	25	20.7	43.4	23.3	42.2	39.2	30.2	35.6	54.6	22.1	41.2333	-2.39333	-20.2	-11.8208	-0.120833	1.27917		A20 (6.6) / PTX	42.2854	0.913183	8	-0.899583	1.14992	8	-13.68	1.78832	8	-10.5403	1.11686	8
						39.4	37.4	40.6		29.6	42.4			16.6	36.8	29.9		26.9	50.1	22.6	27.7	53.5	65.6	41.6	20.1	48.7	59.6	35.9	53.4
					42	22	34	29.1		45.9	49	47.1		12.2	11.7	12.7		25.1	15.6	17.7	37.8	23.8	32.7	20.1	36.6	33.2	24.3	23.1		37.9167	6.10333	-13.0333	-13.0042	-1.46667	4.65
						44.9	47.1	50.4		44.4	33.7			63.2	18	31.5		32.3	22.2	37.8	10.8	63.7	55.4	26.9	32.4	65.9	54.1	54.8
					43	57.6	22.7	34.9		35.3	40.8	38.6		32.3	20.7	53.2		50.2	27.2	43.9	10	42.4	34.1	41.8	21	38.9	18.4	35.1	61.4	41.9833	-1.64333	-4.68333	-7.32619	-7.27083	3.30238
						61.1	43.6	32		40.8	46.2			25.7	58.3	33.6		20.3	47.2	43.8		45.7	28.3	42.4	22	52.2	58.9	52.1
					44	56.9	48.8	33.3		45.3	51.9	33.7		12.7	13.6	22.4	17.1	41.6	46.4	23.8		66.9	28.5	47.4	18.4	36.1	33.4	52.8	19.3	42.5333	-1.81333	-17.9762	-7.61667	0.335417	-6.53333
						35.3	38.6	42.3		37.1	35.6			24.5	32.6	49		35.6	38.3	23.8		64.6	50.6	38.25	28.3	30.7	33.1	46.6
				2	33	55.9	51.5	50		54.3	37.9	51.1		29.1	25.1	44.8	46.8	46.2	20.1	45	45.3	19	29.8	58.9	21	23.9	21.9	39.8	20.5	44.8167	-2.31667	-10.1595	-6.24167	-12.5292	-16.0167
						28.2	49.1	34.2		33.2	41.9	36.6		17.4	16.2	63.2		45.5	28.6	29.5	48.4	37.4	21.7	37.7	32.8	43.2	27.3	14.2	39.6
					34	41.7	62.8	52.2		48.4	49.5	29.2		40.4	29.6	30.5	29.2	32.9	36.8	26.3	34.5	27.8	61.6	35.3	65.2	62.3	46.7	25.7	49.3	46.6333	-4.88333	-16.0708	-14.6958	-5.18333	-4.05833
						51.5	41.3	30.3		49.7	30.7	43		13	17.6	49.3	34.9	38.8	24.8	33.5	27.9	21.2	35	38.8	46.7	42.2	25.3	48.9	40.2
					35	39.4	40.5	53.7		53.4	20.4	41.3		14.8	29.7	16.7	21.5	16.1	21.7	24.9	38.7	50.5	40.5	40.1	32.8	27	45.9	41.4	41.5	41.75	-1.2	-16.7125	-13.275	-1.8875	-3.7625
						37.6	43.8	35.5		46.3	51.9	30		21.6	22.3	50.6	23.1	31.3	21.1	39.8	34.2	44.3	42.6	45.3	22.8	34.5	28.8	40.6	44.2
					36	35.7	53.2	46		44	37.6	60.9		18.1	33.3	14.2	29.3	23.4	11.6	27.5	36.5	45.5	15.7	17.9	65.5	37.6	23.8	42.9	25.2	41.4167	0.95	-10.6042	-10.3417	-6.42917	-7.66667
						32.9	45.7	35		38.8	23.8	49.1		18.5	26.2	46.3	60.6	28.8	34.4	32.2	54.2	50	21.2	32.6	31.5	40.5	31.2	31.6	37.2
			A20 (2.2) / PTX	1	13	26.1	45.9	38.8		33.9	51.9	34.4		18	14.9	31.4	15.5	39.3	39.1	47.1	27.4	27	29.2	23.7	14.2	21.7	15.2	54.3	23.5	38.25	2.89	-7.59286	-1.87857	-14.6875	-7.30714		A20 (2.2) / PTX	43.65	1.0267	8	-1.28125	1.38478	8	-15.6683	1.35391	8	-14.89	2.26336	8
						39.3	45.2	34.2		45.7	39.8			38.9	56	39.9		31.2	36.3	34.2		17.6	16.5	43.4	16.9	25.4	40.2	36.3
					14	49.9	22.8	59.3		61.2	41.2	40.6		17.9	20.8	22.4	34.7	36.6	12.8	56.1	12.8	40	34.9	15.6	15.5	40.6	25.5	31.7	20.9	45.2833	-2.00333	-16.8708	-18.9833	-15.3458	-14.3119
						47.6	28.3	63.8		43.4	30			48.5	18.2	51	13.8	20.5	23.5	21.8		23.7	34	26	49.8	29	33	36.1
					15	51	42.6	54.9		48.3	5.8	54.4		36.9	33.8	38	20.9	16.1	45.5	22.1	50.5	10.5	65.1	36.8	41.8	removed				44.5833	-4.74333	-18.0119	-9.58333	-9.29583	-
						50.5	45.9	22.6		50.8	39.9			15.5	9.9	31		53.2	34	27.9	30.7	41.5	37.2	39.4	10
					16	44.2	53.5	54.9		53.5	44.5	39.8		47.4	20.7	20.5	12.2	19.4	28.6	22		13.9	32	13.2	19.4	16.9	38.9	24.6		41.35	0.59	-16.3786	-19.5667	-13.5071	-17.3167
						26.1	40.5	28.9		38.6	33.3			10.7	51	12.3		22.1	15.8	22.8		39.8	26	50.6		25.3	25.2	13.3
				2	17	54.5	30.6	45.9		34	39.8	39.6		18.5	20.2	18.4		16.8	10.2	30.3	21.4	26.5	17.4	24.1	25.6	37.8	23	22.7	23.8	45.6333	-5.6	-18.0048	-19.8083	-12.8583	-14.6708
						55	54.2	33.6		42	41.2	43.6		20	19.2	62.5	34.6	17.6	45.5	38.4	26.4	40.2	47.9	46.7	33.8	22.2	58.1	17.3	42.8
					18	56.4	21.1	26.5		62.1	54	46.9		23	19.5	48.9	19.6	31.5	12.2	10.3	44	24.3	41.4	41.1	64.4	43.8	18	39.8	32.7	42.2167	4.06667	-19.6792	-19.9667	0.345833	-9.91667
						55.4	35.7	58.2		30	39.2	45.5		12.2	21.8	13.5	21.8	24.8	10.2	11.4	33.6	17.6	62.7	35.5	53.5	40.7	23.1	29.7	30.6
					19	50.6	54.1	38.9		24.3	42.6	55.5		25.7	18.9	39.8	21.7	21.3	26.6	16.5	27	50	42.7	25.8	56	22.7	27.7	64	23.3	47.45	-6.08333	-16.025	-14.0625	-6.8875	-12.6375
						46.2	43.9	51		51.2	42	32.6		24.9	54.8	27.8	37.8	63.6	33.3	50.9	27.9	27.6	52.3	27.2	42.9	32	43.4	38.3	27.1
					20	49.8	30.6	53.5		45.5	51.1	63.2		19	31.4	21	22.9	40.3	21.9	36.8	32.2	38	44.1	13.8	51.2	25.4	23.7	48.7	32.6	44.4333	0.633333	-12.7833	-15.2708	-5.93333	-5.44583
						24.9	61.3	46.5		25	48	37.6		52.7	22.3	22.6	61.3	27.8	11.2	13.9	49.2	48.1	33.2	58.6	21	66.5	28.4	33.4	53.2
[truncated: 99 more columns]

## Sheet: Cold
Data for Figure 3, and for Figure 3, figure supplement 1 and figure supplement 2
			Cold Baselines (paw withdrawal latencies in seconds)
			Group	Session	Rat ID	Day -5				Day 0				Day 7				Day 10				Day 12				Day 14				Day -5	Day 0	Day 7	Day 10	Day 12	Day 14		Group	Day -5			Day 0			Day 7			Day 10
																														Mean	Mean	Mean	Mean	Mean	Mean			Mean	SEM	N	Mean	SEM	N	Mean	SEM	N	Mean	SEM	N
			VEH / VEH	1	9	15.63	10.19	12.87	10.34	13.28	13.12			6.59	11.06	11.9		10.53	13.59	14.13		12.37	11.88	10.28	15.41	15.4	14.9	9.85	14.04	12.2575	0.9425	-2.4075	0.4925	0.2275	1.29		VEH / VEH	12.4356	0.392679	8	-0.2925	0.317371	8	-1.30383	0.564036	8	-0.695625	0.636652	8
					10	10.34	7.94	13.19	13.4	8.6	9.25	13.97		11.93	12.44	12.56		8.57	13.31	11.41		13.53	9.69	14.48	15.06	11.76	11.15	12.03	15.6	11.2175	-0.610833	1.0925	-0.120833	1.9725	1.4175
					11	12.87	14.38	7.75	9.59	8.88	13.5	13.25		4.78	8.25	9.19	6.15	12.22	13.13	10.37		15.25	8.56	8.6	12.59	16.09	16.93	16.31	13.22	11.1475	0.729167	-4.055	0.759167	0.1025	4.0565
																										13.47
					12	14.69	14.42	12.65	13.59	5.79	14.04	14.43	13.94	16.47	11.75	10.43	16.38	10.87	10.53	12.68		11.31	10.53	10.97	11.97	12.81	10.1	15.81	11.4	13.8375	-1.7875	0.2685	-2.4775	-2.6425	-1.3075
														15.5
				1	25	13.38	9.75	13.44	15.37	13.66	11.35			12.07	9.66	11.81	10.35	10.35	8.29	10.78		15.72	11.5	10.19		14.69	11.72	11.9	10.13	12.985	-0.48	-2.0125	-3.17833	-0.515	-0.875
					26	13.84	11.25	15.35	13.13	14.78	12.75	9.6		13.65	11.94	10.6		9.06	12.53	11.5		12.81	10.78	10.62	11.78	10.71	11.53	16.31	14.96	13.3925	-1.01583	-1.32917	-2.3625	-1.895	-0.015
					27	12.69	15.13	12.5	13.22	14.34	13.22	12.97		13.88	9.04	16.37	11.25	14.84	13.5	10.1		14.9	11.41	15.87	12.16	13.53	10.68	11.09	11.97	13.385	0.125	-0.75	-0.571667	0.2	-1.5675
					28	11.62	8.56	10.28	14.59	10.6	11.44			12	1.57	13.5	13.03	13.78	12.81	12.88		14.22	10.22	11.56	18.97	12.1	10.06	12.03		11.2625	-0.2425	-1.2375	1.89417	2.48	0.134167
			VEH / PTX	1	29	12.97	13.47	12.69		9.87	10.65	14.47		7.38	12.84	12	6.28	10.6	8.56	7.19		9.49	11.13	6.38		10.87	10.31	8.9	10.69	13.0433	-1.38	-3.07333	-4.26	-4.04333	-2.85083		VEH / PTX	13.0068	0.270932	20	-0.328875	0.263245	20	-4.134	0.310759	20	-3.37526	0.35149	18
														11.35
					30	8.31	15.68	15.72	7.37	11.37	13.78			4.75	5.84	3.62	5.19	4.85	6.56	8.94	10.66	9.72	10.97	9.47	8.12	10.66	11.31	9.56	9.19	11.77	0.805	-6.92	-3.962	-2.2	-2.02
																		8.03								8.03
					31	14.91	12.44	13.85		13.41	13.38			9.69	9.28	12.25	13.44	removed				removed				removed				13.7333	-0.338333	-3.26933	-	-	-
														7.66
					32	9.75	9.93	10.54		9.6	11.75	8.47		5.65	7.03	6.35	5.16	removed				removed				removed				10.0733	-0.133333	-4.02583	-	-	-
				2	1	16.25	14.94	10.82		16.39	12.59	12.47	12.44	8.31	13.09	4.81	7.04	10.44	11.31	12	10.21	11.19	11.03	10.1	10.87	11.81	12.41	10.32	9.56	14.0033	-0.530833	-5.69083	-3.01333	-3.20583	-2.97833
					2	10.59	15.6	13.11		13.06	11.04	12.94	15.25	5.37	7.16	12.09	11.54	13.35	14.28	7.63	11.16	10.52	11.53	11	9.53	11.47	12.84	10.59	12.6	13.1	-0.0275	-4.06	-1.495	-2.455	-1.225
					3	12.19	16.9	15.37		10	12.82	12.85		6.5	10.81	8.09	10.5	11.31	10.47	8.94	8.72	10.12	9.43	4.03	9.15	13.25	11.03	8.19	12.28	14.82	-2.93	-5.526	-4.96	-6.28	-3.6325
														10.57								9.97
					4	15.03	7.87	14.41		11.91	11.9	10.28		8.97	10.3	9.07	10.59	7.62	14.28	11.32	11.5	12.9	10.6	11.12	12.31	7.44	7.71	10.72	6.97	12.4367	-1.07333	-2.70417	-1.25667	-0.704167	-4.22667
				2	5	13.69	11.78	13.06		15	12.82	10.59		5.22	9.35	9.75	10.91	11.16	10.28	9.81	10.06	10.03	9.31	13.97	11.93	10.12	11.66	10.22	10.5	12.8433	-0.04	-3.85333	-2.51583	-1.53333	-2.21833
														9.72
					6	16.16	11.6	12.93		11.06	13.56	12.94		7.78	7.37	8.22	7.6	6.6	11.69	10.66	11.1	9.13	8.91	9.47	8.09	9.84	12.6	14.32	10.75	13.5633	-1.04333	-5.62533	-3.55083	-4.66333	-1.68583
														8.72
					7	11.5	13.25	11.53		15.62	10.62	14.19	10.43	7.27	11.32	7.49	10.81	3.28	9.59	10.31	4.87	12.03	11.91	12.07	11.34	8.09	12.5	9.78	8.53	12.0933	0.621667	-2.87083	-5.58476	-0.255833	-2.36833
																		4.13	9.53	3.85
					8	12.68	13.19	16.78		16	14.82	11.16		10.41	11.47	5.62	6.79	11.31	3.25	9.62	8.25	11.38	10.94	10.75	11.97	13.65	11.35	13.72	11.91	14.2167	-0.223333	-5.64417	-5.69267	-2.95667	-1.55917
																		10.19
				2	29	11.44	11.87	10.31		11.84	11.59	13.06		6.11	10.21	8.25	11.31	11.94	9.63	9.19	10.22	7.07	11.5	9.41	9.5	10.5	6.81	12.1	10.75	11.2067	0.956667	-2.23667	-0.961667	-1.83667	-1.16667
					30	14	14.22	10.56		12.91	14.07	13.91	9.81	7.91	6.81	9.25	7.69	9.44	8.94	10.12	10.66	5.12	11.25	10.65	9.43	9.69	10.63	9.44	9.56	12.9267	-0.251667	-5.01167	-3.43867	-3.41667	-3.09667
																		8.28				11.1
					31	16.72	11.5	9.19		14.25	11.72	12.84		10.81	13.91	14.03	8.37	10.94	12.78	9.25	8.6	11.82	7.44	10.72	12.06	7.8	13.21	7.84	9.78	12.47	0.466667	-1.916	-1.892	-1.96	-2.8125
														5.65				11.32
					32	14.65	13.9	13.47		15.9	14.54	11.06	11.25	10.13	6.31	10	8.78	12.87	10.12	8.5	4.16	8.09	11.78	10.53	8.4	13.81	11.31	4.4	4.68	14.0067	-0.819167	-4.94267	-4.98267	-4.30667	-5.45667
														10.1				9.47
				2	45	13.47	14.56	15.31		16.84	15.19	11.88		11.38	11.5	8.56	7.59	7.57	13.15	13.13	8.97	removed				removed				14.4467	0.19	-4.68917	-3.74167	-	-
					46	13.28	11.66	11.93		14.91	12.07	14.59		8	5.22	7.63	11.31	9.47	11.65	7.56	11.03	5.6	6.44	11.47	9.72	7.43	13.22	10.28	9.34	12.29	1.56667	-4.19	-2.3625	-3.644	-1.804
														8.34								10				12.16
					47	16.87	13.28	13.69		9.25	12.25	13.12		14.96	5.09	11.14	11	11.16	9.16	8.93	7.25	10.63	11.22	12.9	10.72	9.5	10.44	9.09	12	14.6133	-3.07333	-4.33733	-4.79933	-3.24583	-4.35583
														9.19				12.57
					48	10.44	12.53	14.47		12.38	13.85	13.25		6.75	12.75	11.66		8.15	14.75	13.78	6.59	8.72	15.19	14.28	10.44	11.29	10.84	10.75	11.44	12.48	0.68	-2.09333	-2.285	-0.3225	-1.4
																		7.27	10.63
			S321 (20) / VEH	1	21	12.5	13.75	12.78	10.94	7.06	12.33			8.31	5.47	10.62	11.53	12.19	9.94	11.53	13.66	7.53	12.04	13.44	11.28	13.38	8.69	9.46	10	12.4925	-2.7975	-3.51	-0.6625	-1.42	-2.11		S321 (20) / VEH	12.3608	0.295312	8	-0.193229	0.430415	8	-1.4599	0.670659	8	-0.155583	0.348554	8
					22	8.25	10.63	16.35	10.9	15.4	9.84	12.72		6.5	5.68	10.41		14.62	12.03	10.4		10.88	12.5	10.75		10.75	11.16	9.94	10.84	11.5325	1.12083	-4.0025	0.8175	-0.155833	-0.86
					23	13.07	10.19	7.37	13.28	8.13	10.72	12.69		15.69	7.6	12.59		5.75	13.03	15.62	17.91	10.09	9.1	12.26	10.75	16.5	11.16	13.47	10.4	10.9775	-0.464167	0.9825	1.4525	-0.4275	2.9105
																		9.84								17.91
					24	11.03	9.25	14.81	13.72	8.19	13.22	13.63		8.72	13.96	5.34		9.53	13.06	11.62	10.5	10.51	14.44	11.44		9.69	11.97	13.91	14.41	12.2025	-0.5225	-2.8625	-1.025	-0.0725	0.2925
				2	13	11.69	13.47	12.91		16	12.44	11.91		12.21	11.88	9.68	8.59	12.69	10.37	13.37	10.53	10.97	12.09	11.06	8.53	13.47	12.53	12.53	10.31	12.69	0.76	-1.93	-1.198	-2.0275	-0.51
														11.44				10.5								12.06
					14	16.82	12.25	13.7	11.81	16	13.63	13.53	12.25	11.41	13.97	13.66	13.75	15.28	12.56	13.53	11.56	12.97	11.19	9.44	14	16.25	11.78	11.72	13.47	13.645	0.2075	-0.4475	-0.555	-0.787	-0.865
																		12.52				16.69				10.68
					15	11.75	11.35	13.78		15.34	11.1	12.12		13.84	13.53	12.16	12.37	10.59	8.97	12.91	13.75	15.78	16.41	15.22	14.1	14.91	14.34	15.22	12.88	12.2933	0.56	0.681667	-0.738333	3.08417	2.04417
					16	12.04	13.34	13.78		13.28	12.34	12.31		13.75	11.91	11.28	12.91	13.28	13.84	14.03	13.72	12.82	14.88	14.6	13.15	16	14.88	14.37	13.65	13.0533	-0.41	-0.590833	0.664167	0.809167	1.67167
			S321 (20) / PTX	1	1	15.69	15.91	14.5	9.3	11.53	10.97	8.03		7.22	7.81	21.62	10.38	13.22	13.22	14.37		14.13	10.66	12.25		14.03	11.32	12.31	15.97	13.85	-3.67333	-2.0925	-0.246667	-1.50333	-0.4425		S321 (20) / PTX	12.4522	0.304964	8	0.0234375	0.742325	8	-2.96319	1.18536	8	-1.67667	0.476408	7
					2	14.63	13.72	10.78	11.38	9.44	12.28			2.41	6.78	3.69	4.78	7.81	5.34	6.25	17.53	11.93	10.35	6.5	18.61	6.72	16.16	12.07	14.4	12.6275	-1.7675	-8.4955	-4.0475	-0.78	-0.29
														3				5.97
					3	11.06	6.47	12.56	14	14.45	14.56			5.31	9.13	12.56	5.68	removed				removed				removed				11.0225	3.4825	-2.8525	-	-	-
					4	13.03	11.43	12.19	11.22	14.97	10.94	11.16		4.56	7.44	11.9	11.78	14.59	11.31	7.07	8.68	11.09	7.78	9.16	8.03	12.13	14.53	11.22	13.87	11.9675	0.389167	-3.0475	-1.555	-2.9525	0.97
				2	9	13.53	12.47	11.87		12.43	13.03	11.57		5.46	12.9	5.12	6.12	9.75	11.22	8.91	11.07	14.06	12	11.25	10.47	14.53	10.94	13.79	13.15	12.6233	-0.28	-5.22333	-2.38583	-0.678333	0.479167
					10	12.1	11.12	13.31		12.87	14.97	12.35		16.38	22.97	11.35	12.03	12.69	10.97	10.03	10.56	15.75	15.81	18.6	10.81	15.22	11.69	11.81	11.09	12.1767	1.22	3.50583	-1.11417	3.06583	1.64733
																										19.31
					11	13.13	11.41	11.66		12.13	10.22	15.62		8.97	7.85	12.03	9.84	10.38	11.87	12.87	10.5	9.22	10.66	11.28	8.4	12.43	12.68	13.4	15.41	12.0667	0.59	-2.39417	-0.661667	-2.17667	1.41333
					12	14.41	12.53	12.91		12.59	13.56	14.38		5.18	10.25	16.94	8.34	13.22	12.63	9.75	10.63	15.07	12.69	10.75	12.28	13.53	14.09	11.9	12.31	13.2833	0.226667	-3.10583	-1.72583	-0.585833	-0.623333
																										11.47
			S321 (6.6) / PTX	1	5	11.12	11.59	6.22	13.84	7.87	11.91	11.75		3.66	13.12	8.69	10.69	1.7	9.39	10		7.97	9.53	12	11.69	10.06	9.31	10.69	11.41	11.165	-0.655	-3.303	-4.135	-0.8675	-0.7975		S321 (6.6) / PTX	12.1752	0.627964	8	-0.345021	0.522134	8	-3.68623	0.49877	8	-2.49783	0.810924	8
						10.28	13.94							3.15
					6	11.9	10.15	9	10.62	12.88	13.19			7.47	9.22	10.75	8.21	2.54	7.47	10.5	9.62	removed				removed				10.846	2.189	-1.9335	-3.3135	-	-
						12.56
					7	10.18	8.65	7.47	14.19	6.09	13.39	7.96		6.97	5.31	7.19	10.41	10.23	10.81	10.53		8.25	7.56	7.78	11.78	11.25	11.19	10.91	9.59	10.1225	-0.975833	-2.6525	0.400833	-1.28	0.6125
					8	15.62	8.21	8.59	11.12	8.35	12.04	7.34		3	3.87	10.4	8.13	14.06	12.69	10.13		7.37	7.25	10.22	10.06	11.56	11	11.51	10.69	10.885	-1.64167	-4.535	1.40833	-2.375	0.305
																						7.65
				2	41	13.69	14	16.56		15.75	14.15	12.34		11.44	9.87	10.62	8.16	11.56	13.47	9.63	11.94	12.81	11.04	12.41	10.13	8.91	9.5	10.37		14.75	-0.67	-4.7275	-3.1	-3.1525	-5.15667
					42	16.34	13.5	11.94		12.15	12.66	13.6		11.35	10.06	9.56	10.34	13.63	10.31	11.37	12.41	9.37	11.12	12.59	10.66	10.19	13.5	11.35	10.49	13.9267	-1.12333	-3.59917	-1.99667	-2.99167	-2.05667
																										16.87	8.82
					43	11.85	11.47	11.69		12.53	14.07	13.62		9.04	11.41	6.03	10.15	7.62	8.34	5.34	5.72	7.81	9.94	7.59	7.12	10.72	10.16	9.31	8.31	11.67	1.73667	-2.5125	-4.915	-3.555	-2.045
					44	16.4	13.34	12.37		13.97	12.5	10.78		6.25	10.65	7.78	6.56	7.34	12.88	11.53	7.07	6.44	8.53	6.94	4.69	11.13	10.75	7.97	8.95	14.0367	-1.62	-6.22667	-4.33167	-7.38667	-4.33667
			S321 (2.2) / PTX	1	37	15.63	13.88	12.97	11.79	8.81	12.19			11.68	8.44	15.22		7.22	9.44	9.25		removed				removed				13.5675	-3.0675	-1.7875	-4.93083	-	-		S321 (2.2) / PTX	12.6464	0.328244	8	-0.539208	0.645479	8	-3.7095	0.615691	8	-2.72662	0.633261	7
					38	9.84	9.5	11.32	11.4	11.37	12.85			5.94	3.82	9.13	11.41	4.82	8.28	6.28	8.1	removed				removed				10.862	1.248	-3.746	-3.628	-	-
						12.25								5.28				8.69
					39	12.25	12.41	12.75	11.32	12.69	14.16			4.68	3.85	6	5.19	removed				removed				removed				12.1825	1.2425	-7.2525	-	-	-
					40	12.53	13.44	13.37	12.07	14.47	12.88	11.56		6.37	9.91	9.15	11.91	7.78	7.72	11.25		10.9	8.06	5.72	11.12	10.72	10.59	7.84	10.6	12.8525	0.1175	-3.43083	-3.93583	-3.9025	-3.68417
														7.28	11.91											8.05	7.21
				2	21	13.44	12.79	12.19		12.25	14.66	11.31		10.85	8.32	7.28	11.78	13.56	10.81	14.12	9.31	11.16	9.47	13.85	11.63	9.6	10.19	10.34	10.12	12.8067	-0.0666667	-3.24917	-0.856667	-1.27917	-2.74417
					22	16.09	12.46	12.62		11.66	9.44	8.22	11.22	6.72	6.5	11.53	10.41	10.06	11.25	11.16	9.91	8.41	11.03	10.12	10.84	10.81	11.06	12.69	9.12	13.7233	-3.58833	-4.93333	-3.12833	-3.62333	-2.80333
					23	10.03	12.47	13.69		11.4	9.82	16.03	11.97	7.5	9.28	10.81	7.43	12.82	11.1	12.09	11.03	10.78	10.25	12.12	9.09	5.28	4.94	10.75	10.19	12.0633	0.241667	-3.30833	-0.303333	-1.50333	-4.27333
					24	9.66	19.12	10.56		15.38	13.22	11.46	10.63	13.04	10.88	11.6	9.06	12.31	10.21	10.09	10.63	11.75	9.81	8.37	10	11	12.35	14.12	9.72	13.1133	-0.440833	-1.96833	-2.30333	-3.13083	-1.31583
			A20 (20) / VEH	1	33	11.19	16.44	8.19		11.5	12.63			13.87	14.18	11.84	8.18	13.62	11.81	12.91		9.81	10.34	10.69	11.91	15.75	12.09	11.56	12.94	11.94	0.125	-1.25	0.84	-1.2525	1.145		A20 (20) / VEH	12.9613	0.421305	8	-0.254063	0.389104	8	-0.849563	0.491882	8	-0.779083	0.564234	8
														5.38
					34	13.09	13.47	11.35	10.93	11.37	10.31			12.71	6.09	9.34	12.66	12.1	15.9	13.93		11.69	8.97	9.93	11.56	11.75	12.94	12.25	13.54	12.21	-1.37	-2.624	1.76667	-1.366	0.41
														7.13								12.07
					35	11.19	13.78	7.37	10.66	12.16	13.5			12	11.03	11.63	11.2	12.82	11.31	7.19		13.65	11.25	11.09		14.62	11.9	13.4	13.94	10.75	2.08	0.715	-0.31	1.24667	2.715
					36	11.06	15.97	15.53		12.03	13.78			18.06	13.37	15.78	10.5	12.72	8.93	10.47		8.88	10.84	11.93		8.22	9.03	12.72	10.63	14.1867	-1.28167	0.240833	-3.48	-3.63667	-4.03667
				2	37	13.9	11.41	15.75		16.13	10.12	15	11.94	13.38	12.43	13.69	11.29	11.69	12.34	11.22	11.66	12.41	13.59	15.54	13.6	10.97	11.15	10.16	12.91	13.6867	-0.389167	-0.989167	-1.38467	0.0983333	-2.38917
																		14.6
					38	11.57	15.93	13.31		11.81	14.84	12.88		12.53	13.03	11.68	13.09	13.91	12.25	11.34	12.06	13	14.25	16.15	12.87	12.5	10.94	12.6	13.84	13.6033	-0.426667	-1.02083	-1.47733	0.464167	-1.13333
																		11.07
					39	11.94	13.47	15.96		12.03	12.93	13.75		8.22	13.38	10.78	11.81	13.78	10.94	12.44	12.22	12.59	9.5	13.56	8.53	13.65	13.19	12.93	12.07	13.79	-0.886667	-2.7425	-0.812	-1.58167	-0.83
																		15.51				13.88	15.19
					40	13.88	16.03	10.66		15.09	14.13	12	13.34	13.75	16.44	14.56	12.84	12.53	8.72	13.5	13.37	14.93	14.56	11.47	12.12	13.37	10.38	12.78	11.56	13.5233	0.116667	0.874167	-1.37533	-0.253333	-1.50083
																		12.62
			A20 (20) / PTX	1	17	7.8	8.13	12.85	8.37	14.07	7.53	12.88	8.94	3.28	8.87	14.03	12.48	7.5	7.37	10.28	10.31	8.65	9.56	10.56	11.69	15.84	11.53	12.02		9.2875	1.5675	0.3775	-0.4225	0.8275	3.8425		A20 (20) / PTX	11.6831	0.526151	8	0.35125	0.393051	8	-1.86706	0.532571	8	-1.38229	0.579123	8
					18	13.28	10.97	9.34	11.34	12.22	13.56	11.91		11.44	10.21	8.5	12.48	13.12	9.94	9.31		14.26	9.78	10.56	14.5	13.72	10.85	14.69	11.63	11.2325	1.33083	-0.3265	-0.4425	1.0425	1.49
														11.9
					19	9.69	9.91	12.09		12.03	7.47	7.4		6.38	6.56	8	5.94	4.62	7.78	8.81	4.91	5.15	4.28	9.53	10.59	8.03	5.44	8.84	10.54	10.5633	-1.59667	-3.84333	-4.03333	-1.99733	-2.35333
																						13.28				10.81	5.6
					20	12.18	7	13.22	10.62	11.56	12.56			7.21	10.75	3.87	8.69	10.4	9.65	10.81		12.32	11.53	9.5		10.6	11.53	12.5	15.75	10.755	1.305	-3.125	-0.468333	0.361667	2.189
																										14.34
				2	25	13.28	11.43	14.03		10.69	15.75	13.6		11.94	10.91	12.03	11.9	16.43	12.22	12.06	13.03	10.56	10.85	10.51	12.59	10.28	11.78	10.78	11.22	12.9133	0.433333	-1.21833	0.521667	-1.78583	-1.89833
					26	13.44	11.03	12.75		11.81	11.47	13.75		10.9	10.94	13.03	10.25	9.34	8.46	9.06	13.16	9.84	11.54	11.78	11.22	11	11.35	11	10.72	12.4067	-0.0633333	-1.12667	-2.40167	-1.31167	-1.38917
					27	13.22	11.84	12.19		11.91	13.6	13.56		10.44	9.28	9.41	10.22	14.19	10.25	12.12	11.07	11.07	10.63	10.57	10.35	10.75	9.34	13.69	11.63	12.4167	0.606667	-2.57917	-0.509167	-1.76167	-1.06417
					28	14.13	13.47	14.07		12.82	12.03	14.5		11.69	10.22	9.71	11.56	9.56	13.1	8.72	10.97	11.75	12.56	11.03	9	11.57	9.41	11.41	11.34	13.89	-0.773333	-3.095	-3.3025	-2.805	-2.9575
			A20 (6.6) / PTX	1	41	11.66	14.5	13.34	10.42	8.35	8.97			9.29	10.41	11.69	8.44	13.37	9.25	10.4		14.75	9.78	8.53	13.03	13.6	11	11.19	11.07	11.798	-3.138	-2.8	-0.791333	-0.2755	-0.083		A20 (6.6) / PTX	11.944	0.316516	8	0.173375	0.503463	8	-3.46615	0.666566	8	-1.44433	0.56654	8
						9.07								5.16
					42	11.66	11.03	9.75	8.63	10.9	10.81			5.41	5.85	4.56	11.32	7.5	7.66	15.69		11.12	12.28	5.88	14.97	12	11.5	10.34		10.2675	0.5875	-3.4825	0.0158333	0.795	1.0125
					43	11.82	12.72	11.71	13.87	13.78	12.97			4.37	9.25	8.22	4.62	8.01	8.85	9.09	8.03	9.4	10.72	9.22	11.7	10.63	8.6	12.59	11.12	12.53	0.845	-5.915	-4.035	-2.27	-2.154
																										8.94
					44	12.03	13.72	10.41	10.12	11.16	13.03			3.35	10.5	5.75	11	14.15	7.81	14.75	13.69	15.37	17.94	14.62	10.75	13.97	12.03	12.72	9.12	11.57	0.525	-3.92	0.16	3.1	0.39
																		8.25
				2	33	14.87	8.81	11.44		18.75	11.63	13.37	9.15	7.03	6.75	9.43	7.23	11.22	9.44	11.59	11.25	10.06	9.37	9.03	6.69	10.44	10.97	11.03	14.88	11.7067	1.51833	-4.09667	-0.831667	-2.91917	0.123333
					34	12.28	16.87	11.09		15.44	14.75	10.19	12.71	10.25	10.66	9.59	10.19	9.11	12.44	10.28	7.06	14	10.19	11.87	8.35	11.15	10.65	11.54	12.53	13.4133	-0.140833	-3.24083	-3.69083	-2.31083	-1.94583
					35	11.06	12.63	13.25	11.34	15.06	12.21	11.72		13.66	11.38	14.4	10.97	10.43	14.4	10	10.84	11.91	11.1	9.78	9.28	13.43	10.87	11.4	10.12	12.07	0.926667	0.5325	-0.6525	-1.5525	-0.615
					36	11.25	13.34	12		13.82	10.56	13		10.87	4.07	10.22	4.4	11.22	10	11	9.65	12.71	12.59	11.06	9.31	9.96	9.72	9.16	11.38	12.1967	0.263333	-4.80667	-1.72917	-0.779167	-2.14167
			A20 (2.2) / PTX	1	13	13	9.04	10.57	11.03	14.16	9.62	12.28		7.53	11.57	7.25	7.87	12.97	11.35	12.88		9.84	7.38	9.07		10.78	11.84	10.25		10.91	1.11	-2.355	1.49	-2.14667	0.0466667		A20 (2.2) / PTX	13.0201	0.381862	8	-1.03573	0.450447	8	-4.81854	0.565464	8	-2.32633	0.860384	8
					14	12.12	13.81	14.91	11.65	6.22	11.56	16.31	10.85	3.72	6.91	5.97	6.47	9.03	8.62	11.44		12.69	13.25	13.69	10.72	13.28	13	13.19		13.1225	-1.8875	-7.355	-3.42583	-0.535	0.0341667
					15	13.19	12.21	12.72	12.22	11.94	10.75			14.9	4.93	6.78	7.66	5.03	8.12	11.57	11.9	13.07	8.12	11.28		removed				12.585	-1.24	-4.0175	-2.979	-1.76167	-
																		11.41
					16	13.06	13.04	13.66	12.44	10.31	13.63			13.78	5.97	5.75	4.91	5.97	11	10.97	8.44	10.75	10.22	9.12	12.03	11.15	12.21	13.06	12.9	13.05	-1.08	-5.4475	-3.955	-2.52	-0.72
				2	17	14.31	13	12.47		7.28	12.31	15.06	13.6	10.35	6.09	7.96	6.06	13.88	8.66	13.69	12.37	8.4	10.25	11.37	10.88	13.81	11.69	9.94	11.13	13.26	-1.1975	-5.645	-1.11	-3.035	-1.6175
					18	14.03	13.37	11.41		13.59	10.5	13.06		6.96	8.13	7.53	6.06	12.84	12.81	14.66	11.84	10.6	10.47	12	8.85	12.53	11.56	12.03	14.16	12.9367	-0.553333	-5.76667	0.100833	-2.45667	-0.366667
					19	14.68	13.87	15.91		12.43	8.5	13.53	11.75	13.46	10.94	11.91	10.37	10.25	5.38	10.25	8.5	12.1	8.66	9.84	13.66	8.37	11.41	9.19	10.35	14.82	-3.2675	-3.15	-6.225	-3.755	-4.99
					20	14.37	12.84	13.22		14.1	12.41	13.41		8.84	7.85	8.66	9.31	10.28	10.22	13.19	10.19	10.63	8.75	9.97	10.04	10.6	10.56	7.97	10.28	13.4767	-0.17	-4.81167	-2.50667	-3.62917	-3.62417
[truncated: 99 more columns]

## Sheet: IENFs
Data for Figure 3
	Notes	Rat ID	The first number specifies which session the animal was tested in (1 or 2)
			tThe second number represents the animal ID number (01 - 48)
		Slide ID	Following the decimal, the first number is the slide number (1 - 3)
			The second number represents the tissue section number on the given slide (1 - 8)
			The letter represents the region of interest (ROI) imaged (a=top, b=middle, c=bottom)
		Counter IENFs	The number of IENFs counted from the image acquired of the designated tissue ROI
		Basement Membrane	The length of the basement membrane for the designated tissue ROI as determined with FIJI
		IENF Density	The number of IENFs divided by the basement membrane length (converted to mm), representative IENF density was calculated from the mean of both counters IENF counts
	IENF Density Calculations
																			IENF Density
	Rat ID	Slide ID	Counter 1 (# IENFs)	Counter 2 (# IENFs)	Mean Counts (# IENFs)	Length of Basement Membrane (μm)	Counter 1	Counter 2	Mean		Rat ID	Counter 1	Counter 2	Mean		Group	Session	Rat ID	Counter 1	Counter 2	Mean		Group	IENF Density (Day 16) Counter 1				IENF Density (Day 16) Counter 2				IENF Density (Day 16) Mean
							(IENF/mm)	(IENF/mm)	(IENF/mm)			(IENF/mm)	(IENF/mm)	(IENF/mm)					(IENF/mm)	(IENF/mm)	(IENF/mm)			Mean	SEM	N		Mean	SEM	N		Mean	SEM	N
	202	202.11a	11	13	12	804	13.6816	16.1692	14.9254		202	14.2616	14.5684	14.415		VEH / VEH	1	9	21.2728	20.1101	20.6914		VEH / VEH	22.7073	0.480343	8		21.3787	0.777918	8		22.043	0.610567	8
		202.11b	8	10	9	735	10.8844	13.6054	12.2449									10	23.6993	23.7689	23.7341
		202.11c	12	13	12.5	1140	10.5263	11.4035	10.9649									11	23.1674	22.1247	22.6461
		202.12b	19	15	17	750	25.3333	20	22.6667									12	23.9007	21.8369	22.8688
		202.12c	6	8	7	842	7.12589	9.50119	8.31354								1	25	24.5322	24.6631	24.5976
		202.13b	14	13	13.5	777	18.018	16.731	17.3745									26	22.6766	21.03	21.8533
	203	202.14a	10	12	11	669	14.9477	17.9372	16.4425		203	12.8372	13.9764	13.4068				27	21.6491	18.0235	19.8363
		202.14b	8	9	8.5	768	10.4167	11.7188	11.0677									28	20.76	19.4724	20.1162
		203.11a	9	8	8.5	728	12.3626	10.989	11.6758							VEH / PTX	1	29	12.0951	10.0914	11.0933		VEH / PTX	12.7073	0.374845	17		12.4951	0.651196	17		12.6012	0.480558	17
		203.11b	12	13	12.5	713	16.8303	18.2328	17.5316									30	12.1342	8.44648	10.2904
		203.13a	7	8	7.5	727	9.62861	11.0041	10.3164									31	-	-	-
	201	201.21a	10	11	10.5	837	11.9474	13.1422	12.5448		201	11.7692	10.2097	10.9894				32	-	-	-
		201.22a	6	5	5.5	697	8.60832	7.1736	7.89096								2	1	11.7692	10.2097	10.9894
		201.23a	7	4	5.5	816	8.57843	4.90196	6.7402									2	14.2616	14.5684	14.415
		201.24a	9	9	9	698	12.894	12.894	12.894									3	12.8372	13.9764	13.4068
		201.25a	13	10	11.5	773	16.8176	12.9366	14.8771									4	13.8682	10.6852	12.2767
	209	209.11a	15	17	16	636	23.5849	26.7296	25.1572		209	15.0199	16.7636	15.8918			2	5	13.0755	10.6677	11.8716
		209.11b	20	17	18.5	1044	19.1571	16.2835	17.7203									6	10.9202	9.35926	10.1398
		209.12a	10	13	11.5	749	13.3511	17.3565	15.3538									7	15.8565	17.4397	16.6481
		209.13a	17	19	18	1483	11.4633	12.8119	12.1376									8	12.8926	12.946	12.9193
		209.13b	14	19	16.5	918	15.2505	20.6972	17.9739								2	29	12.4682	12.7642	12.6162
		209.14a	12	11	11.5	1641	7.31261	6.70323	7.00792									30	10.1151	10.5874	10.3512
	210	210.11a	12	13	12.5	776	15.4639	16.7526	16.1082		210	21.8895	21.9101	21.8998				31	10.5282	11.1695	10.8489
		210.11b	14	15	14.5	731	19.1518	20.5198	19.8358									32	11.2382	11.9047	11.5714
		210.21a	12	16	14	702	17.094	22.792	19.943								2	45	-	-	-
		210.22a	14	11	12.5	681	20.558	16.1527	18.3554									46	14.6616	15.5976	15.1296
		210.13a	29	26	27.5	780	37.1795	33.3333	35.2564									47	14.0314	15.5979	14.8146
	211	211.11a	13	7	10	943	13.7858	7.42312	10.6045		211	14.4392	15.8005	15.1199				48	13.271	16.405	14.838
		211.16a	10	12	11	695	14.3885	17.2662	15.8273							S321 (20) / VEH	1	21	20.7691	20.6959	20.7325		S321 (20) / VEH	20.6627	0.284787	8		20.0689	0.453109	8		20.3936	0.33958	8
		211.16b	12	13	12.5	781	15.3649	16.6453	16.0051									22	21.6341	20.245	20.9396
		211.17a	10	13	11.5	883	11.325	14.7225	13.0238									23	20.7305	20.4612	20.5959
		211.17b	16	19	17.5	1033	15.4889	18.393	16.9409									24	21.559	22.1047	21.8318
		211.17c	12	15	13.5	737	16.2822	20.3528	18.3175								2	13	19.4698	18.5607	19.0152
	225	225.12a	21	18	19.5	696	30.1724	25.8621	28.0172		225	23.4719	22.6504	23.0611				14	21.1176	20.9484	21.033
		225.12b	14	12	13	680	20.5882	17.6471	19.1176									15	20.3974	18.3557	19.3765
		225.22a	19	18	18.5	683	27.8184	26.3543	27.0864									16	19.6242	19.1794	19.6242
		225.22b	20	20	20	854	23.4192	23.4192	23.4192							S321 (20) / PTX	1	1	13.7816	13.4813	13.6315		S321 (20) / PTX	16.1277	1.01217	7		15.8206	1.19631	7		16.0091	1.03916	7
		225.22c	10	13	11.5	651	15.361	19.9693	17.6651									2	15.7937	15.7367	15.7652
	226	226.11a	16	14	15	764	20.9424	18.3246	19.6335		226	21.1712	22.9908	22.081				3	-	-	-
		226.12a	12	15	13.5	725	16.5517	20.6897	18.6207									4	16.2037	11.7757	13.9897
		226.21a	15	19	17	718	20.8914	26.4624	23.6769								2	9	15.0199	16.7636	15.8918
		226.21b	20	17	18.5	787	25.413	21.601	23.507									10	21.8895	21.9101	21.8998
		226.22a	12	15	13.5	782	15.3453	19.1816	17.2634									11	14.4392	15.8005	15.1199
		226.14a	22	25	23.5	789	27.8834	31.6857	29.7845									12	15.766	15.276	15.766
	118	119.13a	11	13	12	609	18.0624	21.3465	19.7044		118	19.596	16.9266	18.2613		S321 (6.6) / PTX	1	5	13.9921	11.4232	12.7076		S321 (6.6) / PTX	14.7786	0.9166	7		14.5824	1.34042	7		14.5602	0.977697	7
		119.13b	11	8	9.5	615	17.8862	13.0081	15.4472									6	-	-	-
		119.31c	11	8	9.5	704	15.625	11.3636	13.4943									7	12.2695	10.9498	11.6097
		119.33c	19	16	17.5	687	27.6565	23.2897	25.4731									8	14.1389	13.8902	14.0146
		119.34b	12	10	11	640	18.75	15.625	17.1875								2	41	13.6081	15.5253	14.5667
	133	133.11a	15	13	14	668	22.4551	19.4611	20.9581		133	21.8413	18.0321	19.9367				42	13.6013	13.3068	13.6013
		133.13a	16	17	16.5	800	20	21.25	20.625									43	19.5735	21.5519	19.5735
		133.15b	20	13	16.5	752	26.5957	17.2872	21.9415									44	16.2672	15.4295	15.8484
		133.16a	14	12	13	661	21.18	18.1543	19.6672							S321 (2.2) / PTX	1	37	-	-	-		S321 (2.2) / PTX	13.1183	0.53419	5		13.5983	1.08399	5		13.414	0.728902	5
		133.17b	14	11	12.5	640	21.875	17.1875	19.5312									38	-	-	-
		133.18a	14	9	11.5	633	22.1169	14.218	18.1675									39	-	-	-
		133.19a	14	14	14	750	18.6667	18.6667	18.6667									40	14.9158	17.0001	15.9579
	140	140.11a	11	10	10.5	780	14.1026	12.8205	13.4615		140	14.9158	17.0001	15.9579			2	21	13.5457	11.9039	12.7248
		140.12b	13	15	14	771	16.8612	19.4553	18.1582									22	12.7089	15.2236	13.9662
		140.13b	10	15	12.5	702	14.245	21.3675	17.8063									23	12.6996	12.5886	12.6996
		140.14a	13	14	13.5	843	15.4211	16.6074	16.0142									24	11.7217	11.2752	11.7217
		140.15a	8	10	9	674	11.8694	14.8368	13.3531							A20 (20) / VEH	1	33	21.8413	18.0321	19.9367		A20 (20) / VEH	21.8358	0.24229	8		19.475	0.36506	8		20.6554	0.270063	8
		140.21b	14	15	14.5	813	17.2202	18.4502	17.8352									34	23.4318	20.7242	22.078
		140.22b	11	14	12.5	687	16.0116	20.3785	18.1951									35	21.5367	20.3381	20.9374
		140.23a	9	8	8.5	662	13.5952	12.0846	12.8399									36	21.6143	20.0202	20.8173
	231	231.11b	7	8	7.5	703	9.95733	11.3798	10.6686		231	10.5282	11.1695	10.8489			2	37	21.6875	19.6515	20.6695
		231.17a	7	9	8	678	10.3245	13.2743	11.7994									38	21.6129	19.2653	20.4391
		231.11c	8	8	8	682	11.7302	11.7302	11.7302									39	21.1081	17.8829	19.4955
		231.12b	6	11	8.5	757	7.92602	14.531	11.2285									40	21.8536	19.8853	20.8695
		231.13a	10	4	7	975	10.2564	4.10256	7.17949							A20 (20) / PTX	1	17	20.3306	20.2635	20.2971		A20 (20) / PTX	20.6759	0.454935	8		20.3602	0.817373	8		20.5997	0.570751	8
		231.13b	6	8	7	843	7.11744	9.48992	8.30368									18	19.3557	16.1226	17.7392
		231.15a	9	5	7	707	12.7298	7.07214	9.90099									19	19.9734	22.366	21.1697
		231.15c	7	9	8	696	10.0575	12.931	11.4943									20	20.2947	18.9893	20.2947
		231.16a	10	6	8	697	14.3472	8.60832	11.4778								2	25	23.4719	22.6504	23.0611
		231.16b	7	12	9.5	646	10.8359	18.5759	14.7059									26	21.1712	22.9908	22.081
	107	107.11b	8	8	8	649	12.3267	12.3267	12.3267		107	12.2695	10.9498	11.6097				27	19.7418	19.1867	19.4643
		107.13b	9	6	7.5	747	12.0482	8.03213	10.0402									28	21.0682	20.3124	20.6903
		107.14b	11	11	11	922	11.9306	11.9306	11.9306							A20 (6.6) / PTX	1	41	16.141	14.547	15.344		A20 (6.6) / PTX	16.118	0.421274	8		15.629	0.959981	8		15.8735	0.651393	8
		107.19a	7	4	5.5	663	10.5581	6.03318	8.29563									42	17.403	15.2812	16.3421
		107.23a	12	12	12	712	16.8539	16.8539	16.8539									43	15.8247	14.5844	15.2045
		107.23b	10	5	7.5	656	15.2439	7.62195	11.4329									44	15.6935	13.8972	14.7954
		107.25b	5	10	7.5	722	6.92521	13.8504	10.3878								2	33	17.4132	21.3506	19.3819
	121	121.11b	15	15	15	696	21.5517	21.5517	21.5517		121	20.7691	20.6959	20.7325				34	17.3249	18.0145	17.6697
		121.15b	15	18	16.5	795	18.8679	22.6415	20.7547									35	14.3429	13.9868	14.1648
		121.19a	12	15	13.5	657	18.2648	22.8311	20.5479									36	14.8007	13.3704	14.0856
		121.24a	19	15	17	879	21.6155	17.0648	19.3402							A20 (2.2) / PTX	1	13	13.5721	13.6541	13.6131		A20 (2.2) / PTX	13.3936	1.08305	7		14.2274	1.31954	7		13.8105	1.15591	7
		121.26a	17	14	15.5	722	23.5457	19.3906	21.4681									14	6.97666	7.89224	7.43445
	122	122.11a	11	13	12	522	21.0728	24.9042	22.9885		122	21.6341	20.245	20.9396				15	-	-	-
		122.28a	14	15	14.5	702	19.943	21.3675	20.6553									16	14.4248	13.0062	13.7155
		122.29b	19	12	15.5	832	22.8365	14.4231	18.6298								2	17	14.8494	18.6515	16.7504
		122.12a	15	11	13	660	22.7273	16.6667	19.697									18	14.3218	13.6103	13.9661
		122.27a	19	21	20	880	21.5909	23.8636	22.7273									19	14.9206	15.4191	15.1699
	237	237.11a	20	21	20.5	847	23.6128	24.7934	24.2031		237	21.6875	19.6515	20.6695				20	14.69	17.3583	16.0242
		237.11b	15	12	13.5	673	22.2883	17.8306	20.0594
		237.12a	14	14	14	788	17.7665	17.7665	17.7665
		237.12b	18	16	17	786	22.9008	20.3562	21.6285									rat #	indicates that rat was euthanized prior to end of study
		237.15b	17	13	15	759	22.3979	17.1278	19.7628
		237.21b	12	11	11.5	518	23.166	21.2355	22.2008
		237.23b	16	15	15.5	813	19.6802	18.4502	19.0652
	134	134.11a	17	15	16	658	25.8359	22.7964	24.3161		134	23.4318	20.7242	22.078
		134.11b	13	11	12	685	18.9781	16.0584	17.5182
		134.13a	21	20	20.5	754	27.8515	26.5252	27.1883
		134.14b	14	12	13	655	21.374	18.3206	19.8473
		134.21a	16	13	14.5	711	22.5035	18.2841	20.3938
		134.22a	17	16	16.5	710	23.9437	22.5352	23.2394
		134.25a	13	11	12	702	18.5185	15.6695	17.094
		134.26a	20	18	19	703	28.4495	25.6046	27.027
	141	141.11b	16	16	16	896	17.8571	17.8571	17.8571		141	16.141	14.547	15.344
		141.13b	15	16	15.5	774	19.3798	20.6718	20.0258
		141.13c	11	13	12	847	12.987	15.3483	14.1677
		141.14a	12	9	10.5	824	14.5631	10.9223	12.7427
		141.14b	13	9	11	769	16.9051	11.7035	14.3043
		141.21b	14	12	13	982	14.2566	12.22	13.2383
		141.22a	13	10	11.5	763	17.038	13.1062	15.0721
	142	142.11a	15	14	14.5	804	18.6567	17.4129	18.0348		142	17.403	15.2812	16.3421
		142.11b	13	13	13	638	20.3762	20.3762	20.3762
		142.12b	15	10	12.5	765	19.6078	13.0719	16.3399
		142.13b	15	16	15.5	868	17.2811	18.4332	17.8571
		142.14b	14	9	11.5	721	19.4175	12.4827	15.9501
		142.14c	7	11	9	685	10.219	16.0584	13.1387
		142.15a	16	13	14.5	853	18.7573	15.2403	16.9988
		142.21a	13	8	10.5	872	14.9083	9.17431	12.0413
	204	204.11b	10	8	9	701	14.2653	11.4123	12.8388		204	13.8682	10.6852	12.2767
		204.12a	8	5	6.5	776	10.3093	6.4433	8.37629
		204.12b	10	7	8.5	908	11.0132	7.70925	9.36123
		204.13a	7	5	6	916	7.64192	5.45852	6.55022
		204.13b	9	7	8	609	14.7783	11.4943	13.1363
		204.14b	13	7	10	910	14.2857	7.69231	10.989
		204.17a	12	10	11	923	13.0011	10.8342	11.9177
		204.19a	22	17	19.5	801	27.4657	21.2235	24.3446
		204.21b	11	11	11	792	13.8889	13.8889	13.8889
		204.21c	9	8	8.5	748	12.0321	10.6952	11.3636
	205	205.11a	11	11	11	784	14.0306	14.0306	14.0306		205	13.0755	10.6677	11.8716
		205.11b	6	3	4.5	753	7.96813	3.98406	5.9761
		205.12a	14	12	13	980	14.2857	12.2449	13.2653
		205.12b	12	9	10.5	768	15.625	11.7188	13.6719
		205.13a	16	14	15	883	18.12	15.855	16.9875
		205.13b	11	7	9	859	12.8056	8.14901	10.4773
		205.22a	10	6	8	832	12.0192	7.21154	9.61538
		205.22b	7	6	6.5	828	8.45411	7.24638	7.85024
		205.23a	12	13	12.5	835	14.3713	15.5689	14.9701
	101	101.25a	9	9	9	775	11.6129	11.6129	11.6129		101	13.7816	13.4813	13.6315
		101.13a	11	15	13	1052	10.4563	14.2586	12.3574
		101.15a	10	6	8	758	13.1926	7.91557	10.5541
		101.21a	12	17	14.5	1022	11.7417	16.6341	14.1879
		101.22a	17	15	16	860	19.7674	17.4419	18.6047
		101.24a	11	9	10	691	15.919	13.0246	14.4718
	104	104.21a	10	6	8	680	14.7059	8.82353	11.7647		104	16.2037	11.7757	13.9897
		104.21b	15	14	14.5	792	18.9394	17.6768	18.3081
		104.22a	13	13	13	673	19.3165	19.3165	19.3165
		104.22b	12	6	9	758	15.8311	7.91557	11.8734
		104.24a	11	5	8	772	14.2487	6.47668	10.3627
		104.24b	14	7	10.5	888	15.7658	7.88288	11.8243
		104.25a	12	7	9.5	683	17.5695	10.2489	13.9092
		104.25b	13	10	11.5	903	14.3965	11.0742	12.7353
		104.13a	10	11	10.5	664	15.0602	16.5663	15.8133
	105	105.11a	11	8	9.5	825	13.3333	9.69697	11.5152		105	13.9921	11.4232	12.7076
		105.11b	7	7	7	995	7.03518	7.03518	7.03518
		105.12a	12	8	10	730	16.4384	10.9589	13.6986
		105.12b	9	8	8.5	812	11.0837	9.85222	10.468
		105.13a	13	12	12.5	765	16.9935	15.6863	16.3399
		105.13b	17	16	16.5	910	18.6813	17.5824	18.1319
		105.14a	11	7	9	765	14.3791	9.15033	11.7647
	117	105.14b	14	15	14.5	820	17.0732	18.2927	17.6829		117	20.3306	20.2635	20.2971
		105.15a	17	18	17.5	821	20.7065	21.9245	21.3155
		105.15b	16	16	16	695	23.0216	23.0216	23.0216
		105.16a	19	18	18.5	773	24.5796	23.2859	23.9327
		105.16b	11	10	10.5	676	16.2722	14.7929	15.5325
	119	105.17a	13	14	13.5	596	21.8121	23.4899	22.651		119	19.9734	22.366	21.1697
		105.18a	10	14	12	679	14.7275	20.6186	17.673
		105.18b	17	16	16.5	676	25.1479	23.6686	24.4083
		118.15a	13	15	14	700	18.5714	21.4286	20
		118.23a	13	15	14	663	19.6078	22.6244	21.1161
	130	130.11a	7	5	6	699	10.0143	7.15308	8.58369		130	12.1342	8.44648	10.2904
		130.11b	10	8	9	720	13.8889	11.1111	12.5
		130.12a	9	2	5.5	823	10.9356	2.43013	6.68287
		130.25b	8	7	7.5	688	11.6279	10.1744	10.9012
		130.13b	10	8	9	704	14.2045	11.3636	12.7841
	123	123.13b	12	10	11	655	18.3206	15.2672	16.7939		123	20.7305	20.4612	20.5959
		123.14a	15	12	13.5	770	19.4805	15.5844	17.5325
		123.15b	15	16	15.5	692	21.6763	23.1214	22.3988
		123.16a	17	19	18	661	25.7186	28.7443	27.2315
		123.21a	14	14	14	662	21.148	21.148	21.148
		123.24a	11	15	13	771	14.2672	19.4553	16.8612
		123.27a	16	13	14.5	653	24.5023	19.9081	22.2052
	124	124.11b	17	16	16.5	801	21.2235	19.975	20.5993		124	21.559	22.1047	21.8318
		124.12a	16	15	15.5	841	19.025	17.8359	18.4304
		124.14b	18	18	18	676	26.6272	26.6272	26.6272
		124.16b	17	20	18.5	725	23.4483	27.5862	25.5172
		124.22a	15	13	14	768	19.5312	16.9271	18.2292
		124.26b	14	17	15.5	718	19.4986	23.6769	21.5877
	126	126.11a	7	7	7	287	24.3902	24.3902	24.3902		126	22.6766	21.03	21.8533
		126.12a	17	14	15.5	736	23.0978	19.0217	21.0598
		126.12b	18	19	18.5	708	25.4237	26.8362	26.1299
		126.13a	15	15	15	667	22.4888	22.4888	22.4888
		126.14a	15	13	14	818	18.3374	15.8924	17.1149
		126.15a	15	12	13.5	742	20.2156	16.1725	18.1941
		126.18b	19	21	20	715	26.5734	29.3706	27.972
		126.26b	17	14	15.5	739	23.0041	18.9445	20.9743
		126.28a	14	11	12.5	681	20.558	16.1527	18.3554
	143	143.11a	10	8	9	691	14.4718	11.5774	13.0246		143	15.8247	14.5844	15.2045
		143.12b	10	9	9.5	688	14.5349	13.0814	13.8081
		143.13b	12	10	11	685	17.5182	14.5985	16.0584
		143.15a	12	12	12	811	14.7965	14.7965	14.7965
		143.16a	13	15	14	783	16.6028	19.1571	17.8799
		143.17b	12	9	10.5	756	15.873	11.9048	13.8889
		143.21a	11	11	11	648	16.9753	16.9753	16.9753
	207	207.11a	13	16	14.5	869	14.9597	18.412	16.6858		207	15.8565	17.4397	16.6481
		207.11b	14	17	15.5	752	18.617	22.6064	20.6117
		207.12a	7	8	7.5	667	10.4948	11.994	11.2444
		207.13b	15	15	15	865	17.341	17.341	17.341
		207.15a	7	6	6.5	692	10.1156	8.67052	9.39306
		207.15b	11	10	10.5	713	15.4278	14.0252	14.7265
		207.17b	9	10	9.5	654	13.7615	15.2905	14.526
		207.21b	12	14	13	706	16.9972	19.83	18.4136
		207.24b	12	16	14	744	16.129	21.5054	18.8172
		207.28a	20	20	20	809	24.7219	24.7219	24.7219
	222	222.11b	12	13	12.5	676	17.7515	19.2308	18.4911		222	12.7089	15.2236	13.9662
		222.12b	12	15	13.5	695	17.2662	21.5827	19.4245
		222.13b	7	7	7	692	10.1156	10.1156	10.1156
		222.14a	11	17	14	802	13.7157	21.197	17.4564
		222.15b	12	14	13	737	16.2822	18.9959	17.6391
		222.15c	16	23	19.5	1226	13.0506	18.7602	15.9054
		222.16c	15	13	14	2598	5.77367	5.00385	5.38876
		222.17b	10	13	11.5	756	13.2275	17.1958	15.2116
		222.19a	6	6	6	739	8.11908	8.11908	8.11908
		222.21a	12	12	12	743	16.1507	16.1507	16.1507
		222.22a	9	13	11	758	11.8734	17.1504	14.5119
		222.28a	13	13	13	1416	9.18079	9.18079	9.18079
	228	228.11a	15	17	16	700	21.4286	24.2857	22.8571		228	21.0682	20.3124	20.6903
		228.11b	12	14	13	716	16.7598	19.5531	18.1564
		228.12a	20	23	21.5	988	20.2429	23.2794	21.7611
		228.12b	23	19	21	962	23.9085	19.7505	21.8295
		228.13a	17	12	14.5	950	17.8947	12.6316	15.2632
		228.14b	17	18	17.5	844	20.1422	21.327	20.7346
		228.15a	19	20	19.5	936	20.2991	21.3675	20.8333
		228.16b	20	17	18.5	918	21.7865	18.5185	20.1525
		228.18b	22	20	21	879	25.0284	22.7531	23.8908
		228.21b	16	14	15	766	20.8877	18.2768	19.5822
		228.22a	21	18	19.5	860	24.4186	20.9302	22.6744
		228.24b	19	20	19.5	949	20.0211	21.0748	20.5479
	241	241.11a	12	15	13.5	868	13.8249	17.2811	15.553		241	13.6081	15.5253	14.5667
		241.11b	13	17	15	1000	13	17	15
		241.12a	9	10	9.5	752	11.9681	13.2979	12.633
		241.12b	18	20	19	1040	17.3077	19.2308	18.2692
		241.13a	13	14	13.5	809	16.0692	17.3053	16.6873
		241.13b	11	16	13.5	798	13.7845	20.0501	16.9173
		241.14a	10	11	10.5	697	14.3472	15.7819	15.0646
		241.15b	13	15	14	977	13.306	15.3531	14.3296
		241.16a	11	13	12	1228	8.95765	10.5863	9.77199
		241.21a	11	15	13	764	14.3979	19.6335	17.0157
		241.21b	16	17	16.5	1414	11.3154	12.0226	11.669
		241.25a	12	7	9.5	799	15.0188	8.76095	11.8899
	244	244.11a	14	15	14.5	723	19.3638	20.7469	20.0553		244	16.2672	15.4295	15.8484
		244.12a	11	14	12.5	693	15.873	20.202	18.0375
		244.12b	5	5	5	686	7.28863	7.28863	7.28863
		244.13a	11	6	8.5	687	16.0116	8.73362	12.3726
		244.13b	22	16	19	769	28.6086	20.8062	24.7074
		244.14a	10	10	10	753	13.2802	13.2802	13.2802
		244.15b	12	13	12.5	743	16.1507	17.4966	16.8237
		244.16a	22	18	20	866	25.4042	20.7852	23.0947
		244.21a	13	12	12.5	739	17.5913	16.2382	16.9147
		244.22b	9	12	10.5	771	11.6732	15.5642	13.6187
		244.23a	9	10	9.5	737	12.2117	13.5685	12.8901
		244.25b	9	8	8.5	766	11.7493	10.4439	11.0966
	208	208.11a	11	12	11.5	745	14.7651	16.1074	15.4362		208	12.8926	12.946	12.9193
		208.11b	15	17	16	976	15.3689	17.418	16.3934
		208.12a	8	7	7.5	737	10.8548	9.49796	10.1764
		208.13b	11	12	11.5	1064	10.3383	11.2782	10.8083
		208.22c	11	13	12	812	13.5468	16.0099	14.7783
		208.24a	13	10	11.5	862	15.0812	11.6009	13.3411
		208.24b	13	11	12	1263	10.293	8.70942	9.50119
	217	217.11b	14	18	16	775	18.0645	23.2258	20.6452		217	14.8494	18.6515	16.7504
		217.13a	13	18	15.5	783	16.6028	22.9885	19.7957
		217.13b	20	28	24	1088	18.3824	25.7353	22.0588
		217.13d	5	6	5.5	1064	4.69925	5.6391	5.16917
		217.14c	5	5	5	937	5.33618	5.33618	5.33618
		217.21a	17	16	16.5	835	20.3593	19.1617	19.7605
		217.22b	18	25	21.5	878	20.5011	28.4738	24.4875
	233	233.11a	19	19	19	809	23.4858	23.4858	23.4858		233	17.4132	21.3506	19.3819
		233.12a	14	21	17.5	1105	12.6697	19.0045	15.8371
		233.14a	16	26	21	925	17.2973	28.1081	22.7027
		233.14b	19	22	20.5	1028	18.4825	21.4008	19.9416
		233.15b	14	14	14	998	14.0281	14.0281	14.0281
		233.25a	20	23	21.5	1120	17.8571	20.5357	19.1964
		233.29b	15	19	17	830	18.0723	22.8916	20.4819
	240	240.11b	15	14	14.5	746	20.1072	18.7668	19.437		240	21.8536	19.8853	20.8695
		240.11c	20	18	19	805	24.8447	22.3602	23.6025
		240.13a	13	9	11	692	18.7861	13.0058	15.896
		240.14b	13	14	13.5	605	21.4876	23.1405	22.314
		240.21a	20	19	19.5	798	25.0627	23.8095	24.4361
		240.21b	16	14	15	768	20.8333	18.2292	19.5312
	112	112.15a	14	12	13	559	25.0447	21.4669	23.2558		112	23.9007	21.8369	22.8688
		112.16a	15	16	15.5	627	23.9234	25.5183	24.7209
		112.16b	13	12	12.5	521	24.952	23.0326	23.9923
		112.23a	16	15	15.5	671	23.845	22.3547	23.0999
		112.24b	17	15	16	655	25.9542	22.9008	24.4275
		112.28a	10	8	9	508	19.685	15.748	17.7165
	125	125.11a	15	15	15	667	22.4888	22.4888	22.4888		125	24.5322	24.6631	24.5976
		125.12a	25	27	26	829	30.1568	32.5694	31.3631
		125.13a	17	19	18	820	20.7317	23.1707	21.9512
		125.14b	24	25	24.5	953	25.1836	26.2329	25.7083
		125.21a	18	18	18	726	24.7934	24.7934	24.7934
		125.22a	18	16	17	756	23.8095	21.164	22.4868
		125.24b	21	19	20	855	24.5614	22.2222	23.3918
	136	136.11a	12	10	11	700	17.1429	14.2857	15.7143		136	21.6143	20.0202	20.8173
		136.12b	16	14	15	786	20.3562	17.8117	19.084
		136.13b	18	16	17	778	23.1362	20.5656	21.8509
		136.14a	24	29	26.5	876	27.3973	33.105	30.2511
		136.22b	14	11	12.5	724	19.337	15.1934	17.2652
		136.24a	16	14	15	721	22.1914	19.4175	20.8044
		136.26b	11	10	10.5	506	21.7391	19.7628	20.751
	144	144.12a	16	17	16.5	714	22.409	23.8095	23.1092		144	15.6935	13.8972	14.7954
		144.13b	12	11	11.5	724	16.5746	15.1934	15.884
		144.14b	13	10	11.5	1067	12.1837	9.37207	10.7779
		144.16a	12	11	11.5	679	17.673	16.2003	16.9367
		144.18b	10	9	9.5	724	13.8122	12.4309	13.1215
		144.31b	9	6	7.5	688	13.0814	8.72093	10.9012
		144.32a	11	9	10	779	14.1207	11.5533	12.837
	206	206.11b	7	9	8	764	9.1623	11.7801	10.4712		206	10.9202	9.35926	10.1398
		206.13b	8	5	6.5	786	10.1781	6.36132	8.26972
		206.14a	11	12	11.5	917	11.9956	13.0862	12.5409
		206.15a	8	7	7.5	869	9.20598	8.05524	8.63061
		206.21b	10	7	8.5	697	14.3472	10.043	12.1951
		206.24b	13	12	12.5	826	15.7385	14.5278	15.1332
		206.25c	7	2	4.5	1204	5.81395	1.66113	3.73754
	116	116.11b	8	8	8	701	11.4123	11.4123	11.4123		116	14.4248	13.0062	13.7155
		116.13b	12	8	10	802	14.9626	9.97506	12.4688
		116.15b	13	11	12	799	16.2703	13.7672	15.0188
		116.16b	11	10	10.5	889	12.3735	11.2486	11.811
		116.21b	18	17	17.5	890	20.2247	19.1011	19.6629
		116.23b	17	14	15.5	1147	14.8213	12.2058	13.5135
		116.24b	9	11	10	825	10.9091	13.3333	12.1212
	127	127.11b	20	18	19	800	25	22.5	23.75		127	21.6491	18.0235	19.8363
		127.12b	17	14	15.5	849	20.0236	16.49	18.2568
		127.13b	19	15	17	772	24.6114	19.4301	22.0207
		127.14b	19	17	18	755	25.1656	22.5166	23.8411
		127.23b	14	11	12.5	835	16.7665	13.1737	14.9701
		127.24a	15	10	12.5	749	20.0267	13.3511	16.6889
		127.26b	16	15	15.5	802	19.9501	18.7032	19.3267
	128	128.11b	20	22	21	773	25.8732	28.4605	27.1669		128	20.76	19.4724	20.1162
		128.13a	14	11	12.5	755	18.543	14.5695	16.5563
		128.15a	16	14	15	763	20.9699	18.3486	19.6592
		128.22b	15	15	15	725	20.6897	20.6897	20.6897
		128.23a	18	16	17	827	21.7654	19.347	20.5562
		128.26b	13	11	12	773	16.8176	14.2303	15.5239
		128.27b	15	15	15	726	20.6612	20.6612	20.6612
	218	218.11a	8	7	7.5	727	11.0041	9.62861	10.3164		218	14.3218	13.6103	13.9661
		218.12a	15	12	13.5	788	19.0355	15.2284	17.132
		218.15a	16	14	15	900	17.7778	15.5556	16.6667
		218.17c	12	13	12.5	854	14.0515	15.2225	14.637
		218.21c	11	11	11	737	14.9254	14.9254	14.9254
		218.23a	9	10	9.5	798	11.2782	12.5313	11.9048
		218.25b	10	10	10	821	12.1803	12.1803	12.1803
	219	219.11c	16	16	16	828	19.3237	19.3237	19.3237		219	14.9206	15.4191	15.1699
		219.12a	11	12	11.5	900	12.2222	13.3333	12.7778
		219.13a	16	13	14.5	915	17.4863	14.2077	15.847
		219.22a	11	12	11.5	766	14.3603	15.6658	15.0131
		219.23c	16	18	17	948	16.8776	18.9873	17.9325
		219.25b	11	13	12	892	12.3318	14.574	13.4529
		219.28b	9	9	9	760	11.8421	11.8421	11.8421
	229	229.11a	7	7	7	787	8.89454	8.89454	8.89454		229	12.4682	12.7642	12.6162
		229.11b	15	18	16.5	829	18.0941	21.7129	19.9035
		229.13b	10	11	10.5	952	10.5042	11.5546	11.0294
		229.14a	11	11	11	764	14.3979	14.3979	14.3979
		229.15b	10	9	9.5	807	12.3916	11.1524	11.772
		229.24b	9	8	8.5	736	12.2283	10.8696	11.5489
		229.28b	8	8	8	743	10.7672	10.7672	10.7672
	238	238.11b	27	17	22	1229	21.9691	13.8324	17.9007		238	21.6129	19.2653	20.4391
		238.12c	20	16	18	1240	16.129	12.9032	14.5161
		238.13b	28	23	25.5	1199	23.3528	19.1827	21.2677
		238.17b	20	20	20	888	22.5225	22.5225	22.5225
		238.22a	26	19	22.5	1215	21.3992	15.6379	18.5185
		238.23b	17	20	18.5	803	21.1706	24.9066	23.0386
		238.24b	22	23	22.5	889	24.7469	25.8718	25.3093
	135	135.11b	15	12	13.5	687	21.8341	17.4672	19.6507		135	21.5367	20.3381	20.9374
		135.12a	23	23	23	891	25.8137	25.8137	25.8137
		135.13a	12	14	13	652	18.4049	21.4724	19.9387
		135.14a	18	12	15	841	21.4031	14.2687	17.8359
		135.21a	14	12	13	766	18.2768	15.6658	16.9713
		135.23b	17	21	19	783	21.7114	26.8199	24.2656
		135.24a	19	17	18	815	23.3129	20.8589	22.0859
	220	220.11b	12	9	10.5	688	17.4419	13.0814	15.2616		220	14.69	17.3583	16.0242
		220.12a	11	16	13.5	801	13.7328	19.975	16.8539
		220.16a	14	19	16.5	897	15.6076	21.1817	18.3946
		220.17b	10	14	12	712	14.0449	19.6629	16.8539
		220.22a	13	16	14.5	878	14.8064	18.2232	16.5148
		220.23c	10	13	11.5	839	11.919	15.4946	13.7068
		220.26b	11	10	10.5	720	15.2778	13.8889	14.5833
	230	230.11b	5	5	5	705	7.0922	7.0922	7.0922		230	10.1151	10.5874	10.3512
		230.12c	6	5	5.5	843	7.11744	5.9312	6.52432
		230.14b	10	10	10	913	10.9529	10.9529	10.9529
		230.15a	13	14	13.5	909	14.3014	15.4015	14.8515
		230.25b	5	6	5.5	878	5.69476	6.83371	6.26424
		230.26b	8	7	7.5	904	8.84956	7.74336	8.29646
		230.27a	15	18	16.5	893	16.7973	20.1568	18.477
	232	232.11b	6	5	5.5	862	6.96056	5.80046	6.38051		232	11.2382	11.9047	11.5714
		232.12b	11	11	11	808	13.6139	13.6139	13.6139
		232.12c	7	7	7	785	8.9172	8.9172	8.9172
		232.13c	15	17	16	969	15.4799	17.5439	16.5119
		232.21b	10	13	11.5	847	11.8064	15.3483	13.5773
		232.22b	10	12	11	870	11.4943	13.7931	12.6437
		232.23a	10	8	9	962	10.395	8.31601	9.35551
	234	234.14b	13	13	13	797	16.3112	16.3112	16.3112		234	17.3249	18.0145	17.6697
		234.14a	16	17	16.5	1017	15.7325	16.7158	16.2242
		234.16a	13	10	11.5	786	16.5394	12.7226	14.631
		234.17b	15	16	15.5	756	19.8413	21.164	20.5026
		234.24a	17	18	17.5	791	21.4918	22.756	22.1239
		234.25b	13	16	14.5	779	16.6881	20.5392	18.6136
		234.27a	12	13	12.5	818	14.6699	15.8924	15.2812
	239	239.11a	20	16	18	928	21.5517	17.2414	19.3966		239	21.1081	17.8829	19.4955
		239.12b	20	16	18	798	25.0627	20.0501	22.5564
		239.17b	15	15	15	834	17.9856	17.9856	17.9856
		239.18b	14	12	13	780	17.9487	15.3846	16.6667
		239.21b	19	15	17	829	22.9192	18.0941	20.5066
		239.22a	17	13	15	840	20.2381	15.4762	17.8571
		239.23b	20	19	19.5	907	22.0507	20.9482	21.4994
	246	246.11a	4	2	3	1509	2.65076	1.32538	1.98807		246	14.6616	15.5976	15.1296
		246.13c	21	22	21.5	962	21.8295	22.869	22.3493
		246.15c	15	17	16	1141	13.1464	14.8992	14.0228
		246.18b	14	15	14.5	813	17.2202	18.4502	17.8352
		246.25b	19	22	20.5	1077	17.6416	20.4271	19.0344
		246.27b	13	13	13	857	15.1692	15.1692	15.1692
		246.28a	14	15	14.5	935	14.9733	16.0428	15.508
	213	213.14b	18	16	17	714	25.2101	22.409	23.8095		213	19.4698	18.5607	19.0152
		213.15a	13	11	12	850	15.2941	12.9412	14.1176
		213.22a	16	13	14.5	700	22.8571	18.5714	20.7143
		213.22b	22	26	24	941	23.3794	27.6302	25.5048
		213.23b	18	22	20	995	18.0905	22.1106	20.1005
		213.24a	13	9	11	770	16.8831	11.6883	14.2857
		213.25a	13	13	13	892	14.574	14.574	14.574
	214	214.11c	15	10	12.5	813	18.4502	12.3001	15.3752		214	21.1176	20.9484	21.033
		214.13a	20	20	20	939	21.2993	21.2993	21.2993
		214.13b	23	22	22.5	760	30.2632	28.9474	29.6053
		214.14b	24	23	23.5	1095	21.9178	21.0046	21.4612
		214.16c	20	21	20.5	1145	17.4672	18.3406	17.9039
		214.22a	15	20	17.5	791	18.9633	25.2845	22.1239
		214.25b	21	21	21	1079	19.4625	19.4625	19.4625
	215	215.15b	12	10	11	657	18.2648	15.2207	16.7428		215	20.3974	18.3557	19.3765
		215.16b	16	13	14.5	636	25.1572	20.4403	22.7987
		215.17b	14	17	15.5	686	20.4082	24.7813	22.5948
		215.18b	12	9	10.5	707	16.9731	12.7298	14.8515
		215.25b	14	13	13.5	670	20.8955	19.403	20.1493
		215.26a	14	11	12.5	791	17.6991	13.9064	15.8028
		215.27b	17	16	16.5	727	23.3838	22.0083	22.696
	235	235.11b	10	8	9	707	14.1443	11.3154	12.7298		235	14.3429	13.9868	14.1648
		235.12b	11	16	13.5	745	14.7651	21.4765	18.1208
		235.13b	15	12	13.5	858	17.4825	13.986	15.7343
		235.14a	14	13	13.5	885	15.8192	14.6893	15.2542
		235.22b	10	9	9.5	732	13.6612	12.2951	12.9781
		235.25a	16	12	14	1194	13.4003	10.0503	11.7253
		235.26b	15	19	17	1348	11.1276	14.095	12.6113
	236	236.17a	13	9	11	758	17.1504	11.8734	14.5119		236	14.8007	13.3704	14.0856
		236.18a	16	11	13.5	1177	13.5939	9.34579	11.4698
		236.18b	12	14	13	771	15.5642	18.1582	16.8612
		236.19a	12	14	13	923	13.0011	15.1679	14.0845
		236.26a	12	9	10.5	832	14.4231	10.8173	12.6202
		236.27b	12	12	12	754	15.9151	15.9151	15.9151
		236.28b	17	15	16	1218	13.9573	12.3153	13.1363
	247	247.11a	9	10	9.5	703	12.8023	14.2248	13.5135		247	14.0314	15.5979	14.8146
		247.12b	11	12	11.5	707	15.5587	16.9731	16.2659
		247.15a	12	12	12	908	13.2159	13.2159	13.2159
		247.21b	9	11	10	680	13.2353	16.1765	14.7059
		247.22a	9	8	8.5	762	11.811	10.4987	11.1549
		247.25b	11	15	13	775	14.1935	19.3548	16.7742
		247.26a	13	14	13.5	747	17.4029	18.7416	18.0723
	248	248.16b	12	15	13.5	774	15.5039	19.3798	17.4419		248	13.271	16.405	14.838
		248.17a	11	13	12	780	14.1026	16.6667	15.3846
		248.18b	13	17	15	949	13.6986	17.9136	15.8061
		248.21b	12	13	12.5	738	16.2602	17.6152	16.9377
		248.22b	9	11	10	845	10.6509	13.0178	11.8343
		248.23a	9	12	10.5	736	12.2283	16.3043	14.2663
		248.24a	9	12	10.5	861	10.453	13.9373	12.1951
	120	120.11b	11	9	10	681	14.6843	13.2159	14.6843		120	20.2947	18.9893	20.2947
		120.23b	20	17	18.5	786	23.5369	21.6285	23.5369
		120.13a	16	12	14	763	18.3486	15.7274	18.3486
		120.13b	20	22	21	754	27.8515	29.1777	27.8515
		120.21b	16	11	13.5	885	15.2542	12.4294	15.2542
		120.22a	18	18	18	855	21.0526	21.0526	21.0526
		120.23a	21	18	19.5	914	21.3348	19.6937	21.3348
	212	212.11a	20	17	18.5	1291	14.33	13.1681	14.33		212	15.766	15.276	15.766
		212.11b	15	15	15	880	17.0455	17.0455	17.0455
		212.11c	12	11	11.5	811	14.18	13.5635	14.18
		212.12b	15	15	15	748	20.0535	20.0535	20.0535
		212.13b	12	10	11	769	14.3043	13.0039	14.3043
		212.21a	21	20	20.5	1423	14.4062	14.0548	14.4062
		212.24b	12	12	12	748	16.0428	16.0428	16.0428
	216	216.21a	10	15	12.5	639	19.5618	23.4742	19.5618		216	19.6242	19.1794	19.6242
		216.21b	19	17	18	845	21.3018	20.1183	21.3018
		216.22a	18	17	17.5	977	17.912	17.4002	17.912
		216.22b	17	17	17	833	20.4082	20.4082	20.4082
		216.23a	16	10	13	760	17.1053	13.1579	17.1053
		216.23b	17	15	16	723	22.13	20.7469	22.13
		216.24b	13	13	13	686	18.9504	18.9504	18.9504
	223	223.11b	11	15	13	772	16.8394	19.4301	16.8394		223	12.6996	12.5886	12.6996
		223.12a	10	9	9.5	879	10.8077	10.2389	10.8077
		223.13b	11	9	10	1022	9.78474	8.80626	9.78474
		223.14b	13	11	12	1174	10.2215	9.36968	10.2215
		223.23b	17	19	18	857	21.0035	22.1704	21.0035
		223.27a	13	13	13	885	14.6893	14.6893	14.6893
		223.28b	9	4	6.5	1171	5.55081	3.41588	5.55081
	224	224.14a	16	15	15.5	877	17.6739	17.1038	17.6739		224	11.7217	11.2752	11.7217
		224.15b	11	12	11.5	744	15.457	16.129	15.457
		224.16b	12	7	9.5	743	12.786	9.42127	12.786
		224.17b	7	8	7.5	1000	7.5	8	7.5
		224.23b	9	10	9.5	794	11.9647	12.5945	11.9647
		224.25a	8	8	8	916	8.73362	8.73362	8.73362
		224.26b	9	7	8	1008	7.93651	6.94444	7.93651
	242	242.11b	10	13	11.5	783	14.6871	16.6028	14.6871		242	13.6013	13.3068	13.6013
		242.12a	8	6	7	728	9.61538	8.24176	9.61538
		242.14b	14	13	13.5	902	14.9667	14.4124	14.9667
		242.15a	8	8	8	665	12.0301	12.0301	12.0301
		242.24b	15	14	14.5	933	15.5413	15.0054	15.5413
		242.24c	11	8	9.5	710	13.3803	11.2676	13.3803
		242.25b	12	13	12.5	834	14.988	15.5875	14.988
	243	243.13a	16	24	20	918	21.7865	26.1438	21.7865		243	19.5735	21.5519	19.5735
		243.14b	14	18	16	746	21.4477	24.1287	21.4477
		243.15b	15	16	15.5	833	18.6074	19.2077	18.6074
		243.21a	15	20	17.5	816	21.4461	24.5098	21.4461
		243.21b	14	17	15.5	956	16.2134	17.7824	16.2134
		243.22b	16	18	17	1100	15.4545	16.3636	15.4545
		243.23a	16	17	16.5	748	22.0588	22.7273	22.0588
	109	109.11a	10	15	12.5	657	15.2207	22.8311	19.0259		109	21.2728	20.1101	20.6914
		109.11b	21	19	20	744	28.2258	25.5376	26.8817
		109.12a	15	11	13	850	17.6471	12.9412	15.2941
		109.16a	18	15	16.5	874	20.595	17.1625	18.8787
		109.17b	19	17	18	770	24.6753	22.0779	23.3766
	110	110.11a	10	10	10	412	24.2718	24.2718	24.2718		110	23.6993	23.7689	23.7341
		110.12b	16	19	17.5	733	21.8281	25.9209	23.8745
		110.22b	22	19	20.5	859	25.6112	22.1187	23.865
		110.24b	16	15	15.5	726	22.0386	20.6612	21.3499
		110.27b	22	23	22.5	889	24.7469	25.8718	25.3093
	111	111.11a	17	16	16.5	850	20	18.8235	19.4118		111	23.1674	22.1247	22.6461
		111.12a	25	19	22	951	26.2881	19.979	23.1335
		111.11b	21	20	20.5	806	26.0546	24.8139	25.4342
		111.12b	15	19	17	679	22.0913	27.9823	25.0368
		111.13b	18	16	17	841	21.4031	19.025	20.214
	227	227.11a	17	14	15.5	689	24.6734	20.3193	22.4964		227	19.7418	19.1867	19.4643
		227.12a	7	8	7.5	654	10.7034	12.2324	11.4679
		227.13a	17	15	16	671	25.3353	22.3547	23.845
		227.16b	12	14	13	660	18.1818	21.2121	19.697
		227.16a	15	15	15	757	19.8151	19.8151	19.8151
	129	129.13a	11	8	9.5	690	15.942	11.5942	13.7681		129	12.0951	10.0914	11.0933
		129.13b	9	8	8.5	697	12.9125	11.4778	12.1951
		129.14a	7	3	5	701	9.98573	4.2796	7.13267
		129.22b	10	9	9.5	696	14.3678	12.931	13.6494
		129.17a	5	7	6	688	7.26744	10.1744	8.72093
	108	108.15a	10	11	10.5	722	13.8504	15.2355	14.5429		108	14.1389	13.8902	14.0146
		108.17b	9	8	8.5	648	13.8889	12.3457	13.1173
		108.18b	12	10	11	709	16.9252	14.1044	15.5148
		108.21a	13	11	12	791	16.4349	13.9064	15.1707
		108.22b	9	13	11	938	9.59488	13.8593	11.7271
	102	102.11a	11	12	11.5	779	14.1207	15.4044	14.7625		102	15.7937	15.7367	15.7652
		102.12b	9	11	10	760	11.8421	14.4737	13.1579
		102.15a	15	11	13	743	20.1884	14.8048	17.4966
		102.16a	11	8	9.5	819	13.431	9.76801	11.5995
		102.16a	12	15	13.5	619	19.3861	24.2326	21.8094
	221	221.17a	10	8	9	649	15.4083	12.3267	13.8675		221	13.5457	11.9039	12.7248
		221.17b	9	7	8	828	10.8696	8.45411	9.66184
		221.18a	9	11	10	814	11.0565	13.5135	12.285
		221.24b	9	8	8.5	691	13.0246	11.5774	12.301
		221.27b	14	11	12.5	806	17.3697	13.6476	15.5087
	113	113.12a	8	9	8.5	803	9.96264	11.208	10.5853		113	13.5721	13.6541	13.6131
		113.15c	11	8	9.5	709	15.5148	11.2835	13.3992
		113.11c	12	13	12.5	827	14.5103	15.7195	15.1149
		113.11b	10	8	9	873	11.4548	9.1638	10.3093
		113.28a	11	14	12.5	670	16.4179	20.8955	18.6567
	114	114.13a	6	8	7	842	7.12589	9.50119	8.31354		114	6.97666	7.89224	7.43445
		114.12a	5	7	6	727	6.87758	9.62861	8.25309
		114.12a	2	5	3.5	815	2.45399	6.13497	4.29448
		114.23a	8	6	7	735	10.8844	8.16327	9.52381
		114.24b	5	4	4.5	663	7.54148	6.03318	6.78733

## Sheet: Correlations
Data for Figure 3
			Correlation Analyses
			Group	Session	Rat ID	IENF Density	Mechanical AUC	Cold AUC
			VEH / VEH	1	9	20.6914	41	-5.785
					10	23.7341	20.5	8.375
					11	22.6461	84.85	-11.59
					12	22.8688	-15.25	-17.71
				1	25	24.5976	41.5	-21.59
					26	21.8533	13.4	-19.94
					27	19.8363	17.8	-5.89
					28	20.1162	7.2	2.775
			VEH / PTX	1	29	11.0933	-106.9	-41.76
					30	10.2904	-137.6	-48.09
					31	-	-	-
					32	-	-	-
				2	1	10.9894	-166.5	-47.23
					2	14.415	-261.1	-30.31
					3	13.4068	-266.1	-66.5
					4	12.2767	-143.9	-26.03
				2	5	11.8716	-137.5	-30.97
					6	10.1398	-117.4	-51.68
					7	16.6481	-305.2	-29.02
					8	12.9193	-124.6	-50.68
				2	29	12.6162	-201.1	-15.09
					30	10.3512	-136.4	-44.47
					31	10.8489	-90.75	-19.41
					32	11.5714	-222.6	-54.1
				2	45	-	-	-
					46	15.1296	-116.8	-30.44
					47	14.8146	-242.3	-55.31
					48	14.838	-208.9	-15.84
			S321 (20) / VEH	1	21	20.7325	39.45	-33.95
					22	20.9396	18.4	-15.21
					23	20.5959	50.1	8.965
					24	21.8318	56.95	-18.55
				2	13	19.0152	-4.65	-14.56
					14	21.033	-11.55	-5.365
					15	19.3765	-43.6	11.71
					16	19.6242	-4.95	0.555
			S321 (20) / PTX	1	1	13.6315	-42.85	-27.36
					2	15.7652	-120.4	-60.67
					3	-	-	-
					4	13.9897	-124.1	-22.72
				2	9	15.8918	-19.5	-33.94
					10	21.8998	-69.6	26.84
					11	15.1199	-42.6	-14.49
					12	15.766	-125.6	-20.87
			S321 (6.6) / PTX	1	5	12.7076	-131.6	-31.67
					6	-	-	-
					7	11.6097	-127.3	-17.63
					8	14.0146	-74.5	-29.37
				2	41	14.5667	-210.6	-45.21
					42	13.6013	-185.8	-34.96
					43	19.5735	-107.1	-27.93
					44	15.8484	-190.3	-66.77
			S321 (2.2) / PTX	1	37	-	-	-
					38	-	-	-
					39	-	-	-
					40	15.9579	-263.3	-38.06
				2	21	12.7248	-155.1	-23.95
					22	13.9662	-142.6	-55.08
					23	12.6996	-32.05	-23.73
					24	11.7217	-94.05	-24.72
			A20 (20) / VEH	1	33	19.9367	83.5	-5.045
					34	22.078	-25.7	-15.8
					35	20.9374	12.2	15.33
					36	20.8173	-32.55	-23.3
				2	37	20.6695	13.9	-11.96
					38	20.4391	11.05	-10.52
					39	19.4955	17.45	-22.83
					40	20.8695	-21.45	-0.68
			A20 (20) / PTX	1	17	20.2971	77	11.85
					18	17.7392	-137.8	5.475
					19	21.1697	-36	-41.23
					20	20.2947	39.1	-9.33
				2	25	23.0611	24.35	-8.775
					26	22.081	-66.95	-15.87
					27	19.4643	41.15	-16.62
					28	20.6903	-27.2	-35.03
			A20 (6.6) / PTX	1	41	15.344	-137.8	-27.61
					42	16.3421	-74.45	-12.68
					43	15.2045	-58.65	-43.42
					44	14.7954	-121.2	-10.76
				2	33	19.3819	-115.6	-22.98
					34	17.6697	-148.9	-32.49
					35	14.1648	-128.6	0.56
					36	14.0856	-95.75	-31.17
			A20 (2.2) / PTX	1	13	13.6131	-69.3	-8.44
					14	7.43445	-183.9	-53.04
					15	-	-	-
					16	13.7155	-173.2	-46.69
				2	17	16.7504	-199.6	-42.93
					18	13.9661	-143.5	-35.82
					19	15.1699	-163	-55.28
					20	16.0242	-117.4	-41.8
					rat #	indicates that rat was euthanized prior to end of study

## Sheet: Drug Levels
Data for Figure 3, figure supplement 1
		Plasma Drug Levels (16 h post-injection)
				Plasma Drug Levels
		Group	Session	Rat ID	Day 16			Group	Day 16
									Mean	SEM	N
		VEH / VEH	1	9	16.9			VEH / VEH	10.6238	1.66129	8
				10	13.8
				11	16.2
				12	8.74
			1	25	4.79
				26	6.61
				27	6.25
				28	11.7
		VEH / PTX	1	29	21.9			VEH / PTX	3.72389	1.35805	17
				30	9.82
				31	-
				32	-
			2	1	1.09
				2	1.26
				3	0.99
				4	0.778
			2	5	0.0371
				6	0.11
				7	6.51
				8	9.14
			2	29	3
				30	2.65
				31	2.12
				32	3.22
			2	45	-
				46	0.216
				47	0.134
				48	0.331
		S321 (20) / VEH	1	21	1460			S321 (20) / VEH	890	99.2875	8
				22	780
				23	912
				24	842
			2	13	504
				14	682
				15	910
				16	1030
		S321 (20) / PTX	1	1	1170			S321 (20) / PTX	1182.57	135.407	7
				2	1830
				3	-
				4	1140
			2	9	805
				10	813
				11	1090
				12	1430
		S321 (6.6) / PTX	1	5	1130			S321 (6.6) / PTX	498.143	115.533	7
				6	-
				7	245
				8	432
			2	41	225
				42	419
				43	443
				44	593
		S321 (2.2) / PTX	1	37	-			S321 (2.2) / PTX	175.8	9.91161	5
				38	-
				39	-
				40	197
			2	21	193
				22	175
				23	141
				24	173
		A20 (20) / VEH	1	33	543			A20 (20) / VEH	891.375	117.544	8
				34	442
				35	748
				36	648
			2	37	1280
				38	1160
				39	1220
				40	1090
		A20 (20) / PTX	1	17	453			A20 (20) / PTX	1146.75	290.836	8
				18	465
				19	400
				20	666
			2	25	920
				26	1830
				27	1920
				28	2520
		A20 (6.6) / PTX	1	41	350			A20 (6.6) / PTX	537.875	57.2477	8
				42	396
				43	373
				44	547
			2	33	487
				34	679
				35	746
				36	725
		A20 (2.2) / PTX	1	13	111			A20 (2.2) / PTX	258.714	39.4043	7
				14	210
				15	-
				16	423
			2	17	172
				18	269
				19	297
				20	329
				rat #	indicates that rat was euthanized prior to end of study
																											1460	780	912	842	504	682	910	1030
																																			1170	1830	-	1140	805	813	1090	1430
																																											1130	-	245	432	225	419	443
[truncated: 1 more columns]
